Campos et al. 2022

1 Herbarium Specimen Sequencing Allows Precise Datation of  
2 *Xanthomonas citri* pv. *citri* Diversification History

3 Campos PE<sup>1,2</sup>, Pruvost O<sup>1</sup>, Boyer K<sup>1</sup>, Chiroleu F<sup>1</sup>, Cao TT<sup>1</sup>, Gaudeul M<sup>2,3</sup>, Baider C<sup>4</sup>,  
4 Utteridge TMA<sup>5</sup>, Dominick S<sup>6</sup>, Becker N<sup>2+</sup>, Rieux A<sup>1+\*</sup> & Gagnevin L<sup>7,8+\*</sup>

5

6 <sup>1</sup> CIRAD, UMR PVBMT, F-97410 St Pierre, La Réunion, France.

7 <sup>2</sup> Institut de Systématique, Évolution, Biodiversité (ISyEB), Muséum national d'Histoire naturelle,  
8 CNRS, Sorbonne Université, EPHE, Université des Antilles. 57 rue Cuvier, CP 50, 75005 Paris, France.

9 <sup>3</sup> Herbar national, Muséum national d'Histoire naturelle, CP39, 57 rue Cuvier, 75005 Paris, France.

10 <sup>4</sup> The Mauritius Herbarium, Agricultural Services, Ministry of Agro-Industry and Food Security, R.E.  
11 Vaughan Building (MSIRI Compound), Reduit, 80835, Mauritius.

12 <sup>5</sup> Royal Botanic Gardens, Kew, Richmond, TW9 3AE, UK.

13 <sup>6</sup> USDA, Agricultural Research Service Mycology and Nematology Genetic Diversity and Biology  
14 Laboratory, Beltsville, USA.

15 <sup>7</sup> PHIM Plant Health Institute, Univ. Montpellier, CIRAD, INRAE, Institut Agro, IRD, Montpellier, France.

16 <sup>8</sup> CIRAD, UMR PHIM, Montpellier, France.

17

18 <sup>+</sup> These authors contributed equally to this work.

19 <sup>\*</sup>Corresponding authors: [lionel.gagnevin@cirad.fr](mailto:lionel.gagnevin@cirad.fr) and [adrien.rioux@cirad.fr](mailto:adrien.rioux@cirad.fr)

## 20 Abstract

21 Over the past decade, the field of ancient genomics has triggered considerable progress in the study  
22 of various pathogens, including those affecting crops. In this context, herbarium collections have been  
23 an important source of dated, identified and preserved DNA, whose use in comparative genomics and  
24 phylogeography may shed light into the emergence and evolutionary history of plant pathogens. In  
25 this study, we reconstructed 13 historical genomes of the bacterial crop pathogen *Xanthomonas citri*  
26 pv. *citri* (*Xci*) from infected citrus herbarium specimens using a shotgun-based deep sequencing  
27 strategy. Following authentication of the historical genomes based on ancient DNA damage patterns,  
28 we compared them to a large set of modern genomes to reconstruct their phylogenetic relationships,  
29 pathogeny-associated genes content and estimate several evolutionary parameters, using Bayesian  
30 tip-dating calibration and phylogeography inferences. Our results reveal that *Xci* originated in  
31 Southern Asia ~11,500 years ago and diversified during the beginning of the 13<sup>th</sup> century, after *Citrus*  
32 diversification and before spreading to the rest of the world. This updated scenario links *Xci*  
33 specialization to Neolithic climatic change and the development of agriculture, and its diversification  
34 to the human-driven expansion of citriculture through the early East-West trade and later  
35 colonization. The analysis of data obtained from such historical specimens is challenging and must  
36 undergo adapted treatment before being compared to modern samples. Nevertheless, we confirm  
37 here that herbarium collections are a precious tool to improve the knowledge of the evolutionary  
38 history of plant pathogens.

## 39 Keywords:

40 Crop pathogen, evolution, ancient DNA, phylogenomic inferences, molecular dating, *Xanthomonas*  
41 *citri*

## 42 Introduction

43 Plant pathogens have plagued human societies since the beginning of agriculture (Dark *et al.* 2001). In  
44 such human-engineered ecosystems, the high density and low genetic diversity of hosts, as well as the  
45 environmental homogeneity caused by agricultural practices, facilitated the rise and propagation of  
46 diseases, with the evolution of host-adapted and virulent pathogens (Mira *et al.* 2006, Stukenbrock *et*  
47 *al.* 2008). Intensification of agriculture, monocultures size rise and trade globalization contributed to  
48 the emergence and expansion of pathogens, with opportunities to meet new naive host populations  
49 and realize host shift or host jump (Anderson *et al.* 2004, McCann 2020, Stukenbrock *et al.* 2008).

50 Today, plant pathogens and pests cause up to 40% yield loss in major crops, threatening food security  
51 (Savary *et al.* 2019), agrobiodiversity conservation and public health (Anderson *et al.* 2004, Bernardes  
52 *et al.* 2015). A better understanding of the factors underlying the origin, evolution and emergence of  
53 pathogens would help assess the risks they pose to crops and improve tools for surveillance and  
54 disease control. The combination of genetic material obtained from historic biological collections such  
55 as herbaria and modern samples provides heterochronous datasets which can improve phylogenetic  
56 estimates of evolutionary parameters and the timelines of their emergence and spread by bringing  
57 robust time component to inferences (Duchêne *et al.* 2020, Malmstrom *et al.* 2022, Rieux *et al.* 2014).  
58 Indeed, adding ancient or historical sequences expands the temporal range of the dataset, increasing  
59 the chance to detect evolutionary change, *i.e.*, temporal signal, which can be used to infer substitution  
60 rates and divergence time between lineages, as well as sudden modifications in genetic diversity  
61 (Drummond *et al.* 2002, Drummond *et al.* 2003, Rieux *et al.* 2016a).

62 The most well-studied crop pathosystem using historical herbarium genetic material is *Phytophthora*  
63 *infestans*, the oomycete responsible for potato late blight. Through the sequencing of 19<sup>th</sup> century  
64 infected specimens, the strain which caused the great potato famine in 1845-1849 has been identified  
65 and its genome characterized. Phylogeny reconstruction showed the historical strain to have  
66 originated from a secondary diversification area of the pathogen in North America from where one or  
67 a few dispersal events caused *P. infestans* emergence in Europe (Martin *et al.* 2013, Ristaino 2020,  
68 Saville *et al.* 2016, Yoshida *et al.* 2014, Yoshida *et al.* 2015, Yoshida *et al.* 2013). Similar studies  
69 reconstructing the evolutionary history of crop pathogens from full genomes have been successfully  
70 realized on viruses as well (Al Rwahnih *et al.* 2015, Malmstrom *et al.* 2007, Rieux *et al.* 2021, Smith *et*  
71 *al.* 2014). We recently described the history of the local emergence of the bacterial crop pathogen  
72 *Xanthomonas citri* pv. *citri* (*Xci*) in the South West Indian Ocean, using the first ancient bacterial  
73 genome retrieved from a herbarium specimen (Campos *et al.* 2021).

74 *Xci*, responsible for Asiatic Citrus Canker (ACC) and found in most subtropical citrus-producing regions,  
75 is a serious threat to citriculture. With no available definitive control measure, the disease causes  
76 important economic losses, both by decreasing fruit yield and quality, and because of *Xci* quarantine  
77 organism status (Gottwald *et al.* 2002, Talon *et al.* 2020). *Xci* comprises three major pathotypes,  
78 discriminated by genetic diversity and host range. Pathotype A, with the broadest host-range (nearly  
79 all *Citrus* and several related rutaceous genera), is the most prevalent worldwide (Graham *et al.* 2004).  
80 Pathotypes A\* and A<sup>W</sup>, primarily reported from Asia, are restricted to *Citrus aurantiifolia* and its close  
81 relative *Citrus macrophylla* (Schubert *et al.* 2001, Vernière *et al.* 1998). Pathotype A\* also occasionally  
82 infects Tahiti lime (*C. latifolia*) or sweet lime (*C. limettioides*). A specificity of pathotype A<sup>W</sup> is to elicit  
83 a hypersensitive response on several *Citrus* species, including *C. paradisi* and *C. sinensis* (Sun *et al.*  
84 2004). The phylogenetic relationships between the different pathotypes, first reconstructed using  
85 minisatellite molecular markers (Pruvost *et al.* 2014), before obtaining more resolutive data from  
86 whole genomes (Gordon *et al.* 2015, Zhang *et al.* 2015), suggested that pathotypes A and A<sup>W</sup> are more  
87 closely related to each other than they are to pathotype A\*. Recently, comparative genomic and  
88 phylogenomic analysis of 95 contemporary genomes were used to identify pathotype-specific  
89 virulence-associated genes and infer a probable scenario for *Xci* origin and diversification (Patané *et*  
90 *al.* 2019). This study revealed that the origin of *Xci* occurred much more recently than the main  
91 phylogenetic splits of *Citrus* plants, suggesting dispersion, rather than host-directed vicariance, as the  
92 main driver of this pathogen geographic expansion. However, the sole use of modern genomes  
93 impeded the detection of sufficient *de novo* evolutionary change within the dataset (as referring to  
94 “measurably evolving populations” (Biek *et al.* 2015, Drummond *et al.* 2003)). The authors were thus  
95 compelled to build a timeframe of evolution based on both the extrapolation of rates from external  
96 measures (*i.e.* rate dating) and a constraint on the distribution of a single external node age (*i.e.* node  
97 dating), two dating methodologies known to yield potential misleading estimates (Ho *et al.* 2008,  
98 Rieux *et al.* 2014).

99 In the present study, we took advantage of an extensive sampling covering the last 70 years of *Xci*  
100 strains evolution, along with a broad representation of *Citrus* specimens in herbaria dating back to the  
101 19<sup>th</sup> century. We sequenced historical bacterial genomes of *Xci* from 13 herbarium samples showing  
102 typical canker symptoms, and originating from the putative center of origin of the pathogen.  
103 Authentication based on DNA degradation patterns was established, allowing us to identify, in more  
104 detail, a significant contribution of sample age and library production protocol to deamination rate.  
105 We then compared the historical genomes to those of 171 modern strains representative of the  
106 worldwide genetic diversity, 57 of which specifically sequenced for the purpose of this study. We  
107 aimed to improve knowledge about *Xci* origin and diversification history by 1) reconstructing a

108 thorough time-calibrated phylogeny and inferring evolutionary parameters based on a robust dating  
109 approach within the measurably evolving populations framework, 2) inferring the ancestral  
110 geographical state of lineages and estimating source populations of epidemics, 3) assessing the  
111 pathogenicity-associated gene content across all lineages.

## 112 Material & Methods

### 113 Herbarium material sampling

114 The collections of the Royal Botanic Gardens, Kew (K) ([https://www.kew.org/science/collections-and-](https://www.kew.org/science/collections-and-resources/collections/herbarium)  
115 [resources/collections/herbarium](https://www.kew.org/science/collections-and-resources/collections/herbarium)), the Mauritius Herbarium (MAU)  
116 (<https://agriculture.govmu.org/Pages/Departments/Departments/The-Mauritius-Herbarium.aspx>),  
117 the Muséum national d'Histoire naturelle (P) ([https://www.mnhn.fr/fr/collections/ensembles-](https://www.mnhn.fr/fr/collections/ensembles-collections/botanique)  
118 [collections/botanique](https://www.mnhn.fr/fr/collections/ensembles-collections/botanique)), the US National Fungus Collections (BPI) ([https://nt.ars-](https://nt.ars-grin.gov/fungaldatabases/specimens/specimens.cfm)  
119 [grin.gov/fungaldatabases/specimens/specimens.cfm](https://nt.ars-grin.gov/fungaldatabases/specimens/specimens.cfm)) and the U.S. National Herbarium (US)  
120 (<https://collections.nmnh.si.edu/search/botany/>) were prospected between May 2016 and October  
121 2017. *Citrus* specimens displaying typical Asiatic citrus canker lesions were sampled on site using  
122 sterile equipment and transported back to the laboratory inside individual envelopes where they were  
123 stored at 17°C in vacuum-sealed boxes until use. Thirteen historic specimens collected between 1845  
124 to 1974 and conserved in five different herbaria were selected for analysis (Table 1). Those were  
125 chosen as the oldest available from Asia, the supposed geographic origin of *Xci*, as well as from  
126 Oceania and the Southwest Indian Ocean. Among the 13 herbarium specimens, 12 were processed  
127 during the course of this study, while HERB\_1937 was processed previously (Campos *et al.* 2021).

128 **Table 1. General characteristics of the 13 herbarium specimens.**

| ID        | Herbarium code | Herbarium specimen ID | Collection year | Location           | Host                        |
|-----------|----------------|-----------------------|-----------------|--------------------|-----------------------------|
| HERB_1845 | P              | P05297986             | 1845            | Indonesia, Java    | <i>Citrus aurantiifolia</i> |
| HERB_1852 | K              | Q1874                 | 1852            | India, Khasi hills | <i>Citrus medica</i>        |
| HERB_1854 | K              | Q1954                 | 1854            | Indonesia, Java    | <i>Citrus aurantiifolia</i> |
| HERB_1859 | P              | P05240716             | 1859            | Bangladesh         | <i>Citrus medica</i>        |
| HERB_1865 | K              | Q1889                 | 1865            | India              | <i>Citrus medica</i>        |
| HERB_1884 | K              | 1206                  | 1884            | Philippines, Luzon | <i>Citrus medica</i>        |
| HERB_1911 | P              | P05297996             | 1911            | Indonesia, Java    | <i>Citrus aurantiifolia</i> |
| HERB_1915 | P              | P05297992             | 1915            | Philippines        | <i>Citrus</i> sp.           |
| HERB_1922 | US             | 1756364               | 1922            | China, Yunnan      | <i>Citrus medica</i>        |
| HERB_1937 | MAU            | MAU0015151            | 1937            | Mauritius          | <i>Citrus</i> sp.           |
| HERB_1946 | BPI            | 686249                | 1946            | Guam, Tlofofo      | <i>Citrus</i> sp.           |
| HERB_1963 | K              | 630116                | 1963            | Nepal, Sanichare   | <i>Citrus medica</i>        |
| HERB_1974 | MAU            | MAU0015154            | 1974            | Mauritius          | <i>Citrus</i> sp.           |

## 129 Ancient DNA extraction and library preparation

130 DNA extraction from herbarium samples was performed in a bleach-cleaned facility room with no  
131 exposure to modern *Xci* DNA, as described in Campos *et al.* (2021), along with herbarium samples of  
132 *Coffea* sp., a non *Xci*-host species acting as negative control. Following extraction, fragment size and  
133 concentration were controlled using TapeStation (Agilent Technologies) high sensitivity assays,  
134 according to the manufacturers' recommendations. Seven herbarium samples were converted into  
135 double-stranded libraries using the aDNA-adapted BEST (Blunt-End-Single-Tube) protocol from Carøe  
136 *et al.* (2017). Library preparation of the remaining six herbarium samples was outsourced to Fasteris  
137 (<https://www.fasteris.com/dna/>) where DNA was converted into a double-stranded library following  
138 a custom TruSeq Nano DNA protocol (Illumina) without prior fragmentation and using a modified bead  
139 ratio adapted to small fragments.

## 140 Modern bacterial strains culture, DNA extraction and library preparation

141 Fifty-seven bacterial strains isolated between 1963 and 2008, mainly from Asia (S1 Table) and stored  
142 as lyophiles at -80°C, were chosen to complete the collection of available modern genomes. Strains  
143 were grown at 28°C on YPGA (7 g/L yeast extract, 7 g/L peptone, 7 g/L glucose, 18 g/L agar,  
144 supplemented by 20 mg/L propiconazole, pH 7.2). Single cultures were used for DNA extraction using  
145 the Wizard® genomic DNA purification kit (Promega) following the manufacturer's instructions.  
146 Quality assessment was realized for concentration using QuBit (Invitrogen) and Nanodrop (Thermo  
147 Fisher Scientific) fluorometers. Library preparation of the modern strains was outsourced to Fasteris  
148 where classic TruSeq Nano DNA protocol following Nextera enzymatic DNA fragmentation was applied  
149 (Illumina). Sequencing for both historical and modern DNA was performed in a paired-end 2×150  
150 cycles configuration on a NextSeq500 machine in several batches, with samples from both types of  
151 libraries being independently treated.

## 152 Initial reads trimming and merging

153 Artefactual homopolymer sequences were removed from libraries when presenting entropy inferior  
154 than 0.6 using BBDuk from BBMap 37.92 (DOE Joint Genome Institute). Adaptors were trimmed using  
155 the Illuminaclip option from Trimmomatic 0.36 (Bolger *et al.* 2014). Such reads were processed into  
156 the *post-mortem* DNA damage assessment pipeline detailed in the section below. Additional quality-  
157 trimming was realized with Trimmomatic based on base-quality (LEADING:15; TRAILING:15;  
158 SLIDINGWINDOW:5:15) and read length (MINLEN:30). Paired reads were then merged using  
159 AdapterRemoval 2.2.2 (Schubert *et al.* 2016) with default options.

## 160 Ancient DNA damage assessment and statistical analyses

161 *Post-mortem* DNA damage was measured by DNA fragment length distribution and terminal  
162 deamination patterns using mapDamage 2.2.1 (Jonsson *et al.* 2013). Alignments required for  
163 mapDamage were performed with an aligner adapted to short reads BWA-aln 0.7.15 (default options,  
164 seed disabled) (Li *et al.* 2009) for the herbarium samples and Bowtie 2 (options --non-deterministic --  
165 very-sensitive) (Langmead *et al.* 2012) for modern strains, using *Xci* reference strain IAPAR 306  
166 genome (chromosome NC\_003919.1, plasmids pXAC33 NC\_003921.3 and pXAC64 NC\_003922.1).  
167 MarkDuplicates in picardtools 2.7.0 (Broad Institute) was run to remove PCR duplicates. For each  
168 sample, reads were grouped in nucleotide length classes of 25 nucleotide-long intervals, from 15 to  
169 290 nucleotides (*i.e.*, 11 classes). Analysis of variance aov function (“stats” R package) was used to test  
170 the effect of protocol (BEST or TruSeq), DNA type (plasmid or chromosome), and age (years) on  
171 nucleotide length classes. When significant, a *Student t.test* was performed. Deamination rate data of  
172 each sample took into account: the number of terminal 3’ G>A substitutions, divided by the total  
173 number of reads bearing a G at the same position (according to the reference sequence). Effect of  
174 protocol (BEST or TrueSeqNano) and age (in years) on deamination rate was assessed using a glm  
175 model (“stats” R package), under quasi-binomial distribution. Effect of DNA type (plasmid or  
176 chromosome) was specifically tested using glmPQL function, allowing the analysis of paired  
177 variables.

## 178 Genome reconstruction

179 Genomes were reconstructed by mapping quality-trimmed reads to *Xci* reference strain IAPAR 306  
180 genome using BWA-aln for short reads (Li *et al.* 2009) and Bowtie 2 for longer reads (Langmead *et al.*  
181 2012), as defined above. Sequencing depths were computed using BEDTools genomecov 2.24.0  
182 (Quinlan *et al.* 2010). For herbarium specimens, BAM (Binary Alignment Map) files were extremity-  
183 trimmed on their 5 external nucleotides at each end using BamUtil 1.0.14 (Jun *et al.* 2015). SNPs (Single  
184 Nucleotide Polymorphisms) were called with GATK UnifiedGenotyper (DePristo *et al.* 2011); they were  
185 considered dubious and filtered out if they met at least one of the following conditions: “depth<20”,  
186 “minor allelic frequency<0.9” and “mapping quality<30”. Consensus sequences were then  
187 reconstructed by introducing the high-quality SNPs in the *Xci* reference genome and replacing dubious  
188 SNPs and non-covered sites (depth=0) by an N.

## 189 Phylogeny & tree-calibration

190 A dataset of 171 modern *Xci* genomes (date range: 1948 - 2017) representative of *Xci* global diversity  
191 was built from 114 previously published genomes and 57 new genomes generated within the course  
192 of this study (S1 Table). An alignment of the 13 historical chromosome sequences with the 171 modern

193 sequences was constructed for phylogenetic analyses, with strains of *Xanthomonas axonopodis* pv.  
194 *vasculorum* NCPPB-796 from Mauritius (isolated in 1960, GCF\_013177355.1), *Xanthomonas citri* pv.  
195 *cajani* LMG558 from India (1950, GCF\_002019105.1) and *Xanthomonas citri* pv. *clitoriae* LMG9045  
196 from India (1974, GCA\_002019345.1) as outgroups. Variants from modern strains were independently  
197 called and filtered using the same parameters as for historical genomes. Recombinant regions were  
198 identified inside the *Xci* dataset (ingroup only) with ClonalFrameML (Didelot *et al.* 2015) and removed,  
199 to avoid production of incongruent trees during phylogenetic reconstruction. Two SNP (Single  
200 Nucleotide Polymorphism) datasets were constructed, either within the *Xci* ingroup only, or from  
201 across the whole dataset (ingroup + outgroups). A Maximum Likelihood (ML) tree was constructed on  
202 both SNP alignments using RAxML 8.2.4 (Stamatakis 2014) using a rapid Bootstrap analysis, a General  
203 Time-Reversible model of evolution following a  $\Gamma$  distribution with four rate categories (GTRGAMMA)  
204 and 1,000 alternative runs (Lanave *et al.* 1984).

205 As a requirement to build tip-calibrated phylogenies, the existence of a temporal signal was  
206 investigated thanks to three different tests. First, a linear regression test between sample age and  
207 root-to-tip distances was computed at each internal node of the ML tree using PhyloStems (Doizy *et al.*  
208 *et al.* 2020). Temporal signal was considered present at nodes displaying a significant positive  
209 correlation. Secondly, a date-randomization test (DRT) (Duchêne *et al.* 2015b) was performed with 20  
210 independent date-randomized datasets generated using the R package “TipDatingBeast” (Rieux *et al.*  
211 2016b). Temporal signal was considered present when there was no overlap between the inferred  
212 root height 95% Highest Posterior Density (95% HPD) of the initial dataset and that of 20 date-  
213 randomized datasets. Finally, a Mantel test with 1,000 date-randomized iterations investigating  
214 whether closely related sequences were more likely to have been sampled at similar times was also  
215 performed to ensure no confounding effect between temporal and genetic structure, as recent work  
216 suggested that temporal signal investigation through root to-tip-regression and DRT could be misled  
217 in such a case (Murray *et al.* 2016).

218 Tip-dating calibration Bayesian inferences (BI) were performed on the primary SNP alignment (*Xci*  
219 ingroup) with BEAST 1.8.4 (Drummond *et al.* 2007). Leaf heights were constrained to be proportional  
220 to sample ages. Flat priors (*i.e.*, uniform distributions) for the substitution rate ( $10^{-12}$  to  $10^{-2}$   
221 substitutions/site/year) and for the age of all internal nodes in the tree were applied. We also  
222 considered a GTR substitution model with a  $\Gamma$  distribution and invariant sites (GTR+G+I), an  
223 uncorrelated relaxed log-normal clock to account for variations between lineages, and a tree prior for  
224 demography of coalescent extended Bayesian skyline. The Bayesian topology was conjointly estimated  
225 with all other parameters during the Markov chain Monte-Carlo (MCMC) and no prior information



226 from the tree was incorporated in BEAST. Five independent chains were run for 200 million steps and  
227 sampled every 20,000 steps, discarding the first 20,000 steps as burn-in. BEAGLE (Broad-platform  
228 Evolutionary Analysis General Likelihood Evaluator) library was used to improve computational speed  
229 (Ayres *et al.* 2012, Suchard *et al.* 2009). Convergence to the stationary, sufficient sampling (effective  
230 sample size > 200) and mixing were checked by inspecting posterior samples with Tracer 1.7.1  
231 (Rambaut *et al.* 2018). Final parameters estimation was based on the combination of the different  
232 chains. Maximum clade credibility method in TreeAnnotator (Drummond *et al.* 2007) was used to  
233 determine the best-supported tree of the combined chains.

234 Rate-dating calibration outside the *Xci* clade was performed on the secondary SNP alignment (ingroup  
235 + outgroups) with BEAST 1.8.4 (Drummond *et al.* 2007). Instead of using tip-dates, we applied a prior  
236 on the substitution rate by drawing values from a normal distribution with mean and standard  
237 deviation values fixed as those inferred using tip-dating calibration within *Xci* ingroup. All other  
238 parameters were applied as described previously.

#### 239 Phylogeography & ancestral location state reconstruction

240 The presence of geographic structure in the ML tree was measured through calculation of the  
241 Association Index (AI) and the comparison of its value with the ones computed from 1,000 location-  
242 randomized trees (Parker *et al.* 2008). Non-random association between phylogeny and location was  
243 assumed when less than 5% of AI values computed from the randomized trees were smaller than the  
244 AI value of the real ML tree.

245 Ancestral location state was reconstructed using BEAST 1.8.4 under the same parameters as tip-dating  
246 calibration but adding a partition for location character. We modelled discrete location transitioning  
247 between areas throughout *Xci* phylogenetic history using a continuous-time Markov chain (CTMC)  
248 process under an asymmetric substitution model with a Bayesian stochastic search variable selection  
249 (BSSVS) procedure. States were recoded from countries to greater areas: East Africa (Ethiopia), West  
250 Africa (Mali and Senegal), the Caribbean (Martinique, France), North America (United States of  
251 America), South America (Argentina and Brazil), East Asia 1 (China and Taiwan), East Asia 2 (Japan),  
252 South East Asia 1 (Cambodia, Malaysia, Myanmar, Thailand and Vietnam), South East Asia 2 (Indonesia  
253 and Philippines), South Asia 1 (Bangladesh, India and Nepal), South Asia 2 (Iran and Pakistan), West  
254 Asia (Oman and Saudi Arabia), Oceania and Pacific (Fiji, Guam, New Zealand and Papua New Guinea),  
255 North Indian Ocean islands (Maldives and Seychelles), and South West Indian Ocean islands (Comoros,  
256 Mauritius and Rodrigues, Mayotte and La Réunion (France)).

## 257 Pathogenicity-associated genes content analysis

258 The presence of pathogenicity-associated genes was investigated using a list of 66 type III effectors  
259 (T3E) found in *Xanthomonas* (Escalon *et al.* 2013, The Xanthomonas Resource) as well as 24 genes  
260 involved in type III secretion system (T3SS) (Buttner 2016) and 54 genes more distantly involved in  
261 pathogenicity (S4 Table). Alignments were performed either with BWA-aln or Bowtie 2 (same  
262 conditions as above), for herbarium samples and modern strains, respectively. The sequences used to  
263 assess homology were the reference strain IAPAR 306 CDS (coding sequences) when available; when  
264 not, variants from other *Xci* strains or other *Xanthomonas* CDS were used. Depth was recovered using  
265 BEDTools genomecov 2.24.0 (Quinlan *et al.* 2010) and coverage was calculated with R. Genes were  
266 considered present if their sequence was covered on more than 75% of its length. The pathogenicity-  
267 associated genes content was then projected on BI phylogenetic tree using the gheatmap function of  
268 R “ggtree” package (Yu *et al.* 2017).

## 269 Results

### 270 Laboratory procedure & high-throughput sequencing

271 Thirteen herbarium samples were processed into libraries, using a TruSeq Nano (Illumina) protocol for  
272 seven of them, and a home-made BEST protocol for the six others (Carøe *et al.* 2017). Sequencing  
273 produced between 56.3 and 365.2 M paired-end reads. Following quality checking and adaptor  
274 trimming, reads were merged, presenting insert median length of 32 to 92 nt (mean lengths of  $42.1 \pm$   
275  $12.8$  to  $102.9 \pm 45.1$  nt).

### 276 Historical genomes reconstruction & ancient DNA damage pattern assessment

277 Thirteen historical draft *Xci* genomes were reconstructed by mapping processed reads on reference  
278 strain IAPAR 306 genome (chromosome, plasmids pXAC33 and pXAC64) (da Silva *et al.* 2002), with one  
279 of them, HERB\_1937, detailed previously (Campos *et al.* 2021). The proportion of reads mapping to  
280 *Xci* reference genome ranged from 0.82% (HERB\_1937) to 27.10% (HERB\_1922) (Table 2). Respective  
281 values of 0.0027, 0.0090 and 0.0196% were obtained for three herbarium *Coffea* sp. control samples.

282 **Table 2. Summary of mapping, depth, coverage and damage statistics for the 13 historic *Xci* genomes.**  
 283 SD: standard deviation; nt: nucleotides.

| ID        | Protocol    | Chromosome    |                               |           |                    |                                   |                                           |
|-----------|-------------|---------------|-------------------------------|-----------|--------------------|-----------------------------------|-------------------------------------------|
|           |             | Million reads | Endogenous <i>Xci</i> DNA (%) | Depth (X) | Coverage at 1X (%) | Insert length (mean $\pm$ SD, nt) | Deamination rate at terminal position (%) |
| HERB_1845 | TruSeq Nano | 414.3         | 10.39                         | 82.1      | 98.3               | 50.4 $\pm$ 23.0                   | 3.68                                      |
| HERB_1884 | TruSeq Nano | 246.8         | 10.48                         | 55.6      | 98.1               | 46.2 $\pm$ 16.6                   | 3.22                                      |
| HERB_1911 | TruSeq Nano | 365.2         | 2.05                          | 32.4      | 98.2               | 69.1 $\pm$ 22.3                   | 3.70                                      |
| HERB_1915 | TruSeq Nano | 217.3         | 6.04                          | 39.3      | 98.1               | 47.9 $\pm$ 17.9                   | 2.81                                      |
| HERB_1937 | TruSeq Nano | 220.9         | 0.82                          | 6.2       | 94.6               | 42.7 $\pm$ 12.7                   | 3.65                                      |
| HERB_1946 | TruSeq Nano | 262.5         | 7.52                          | 64.3      | 98.2               | 57.9 $\pm$ 29.5                   | 1.81                                      |
| HERB_1974 | TruSeq Nano | 260.8         | 6.80                          | 35.9      | 97.9               | 41.1 $\pm$ 9.3                    | 2.09                                      |
| HERB_1852 | BEST        | 314.9         | 4.81                          | 63.7      | 97.8               | 70.9 $\pm$ 43.6                   | 1.89                                      |
| HERB_1854 | BEST        | 113.0         | 10.76                         | 54.1      | 98.3               | 75.7 $\pm$ 42.8                   | 1.22                                      |
| HERB_1859 | BEST        | 159.5         | 5.31                          | 41.8      | 97.7               | 73.9 $\pm$ 33.8                   | 1.76                                      |
| HERB_1865 | BEST        | 156.5         | 4.91                          | 49.8      | 98.2               | 88.1 $\pm$ 39.2                   | 1.57                                      |
| HERB_1922 | BEST        | 120.9         | 27.10                         | 96.2      | 97.3               | 67.9 $\pm$ 29.3                   | 1.22                                      |
| HERB_1963 | BEST        | 56.3          | 14.63                         | 43        | 98.0               | 74.7 $\pm$ 32.3                   | 1.25                                      |

284

285 The chromosome sequences displayed a coverage (proportion of reference genome covered) at 1X  
 286 between 94.6 and 98.2%, with mean depth (average number of mapped reads at each base of the  
 287 reference genome) of 6.2 (HERB\_1937) to 96.2X (HERB\_1922) (Table 2). Lower coverages (49.7 to  
 288 97.1%) but higher mean depths (17.9 to 130.3X) were obtained for reads mapping to plasmid  
 289 references (S2 Table).

290 Ancient DNA typically presents short fragments and cytosine deamination at fragment extremities  
 291 (Dabney *et al.* 2013). We analyzed such degradation patterns using the dedicated tool mapDamage2  
 292 (Jonsson *et al.* 2013). For reads aligning to the chromosome sequence, herbarium samples displayed  
 293 mean fragments length of 41.1  $\pm$  9.3 to 88.1  $\pm$  39.2 nt, and 3'G>A substitution rates at terminal  
 294 nucleotides of 1.22 to 3.70%, decreasing exponentially along the DNA molecule for all historical  
 295 genomes. Modern DNA controls from three *Xci* strains displayed no such decay (Figure 1).

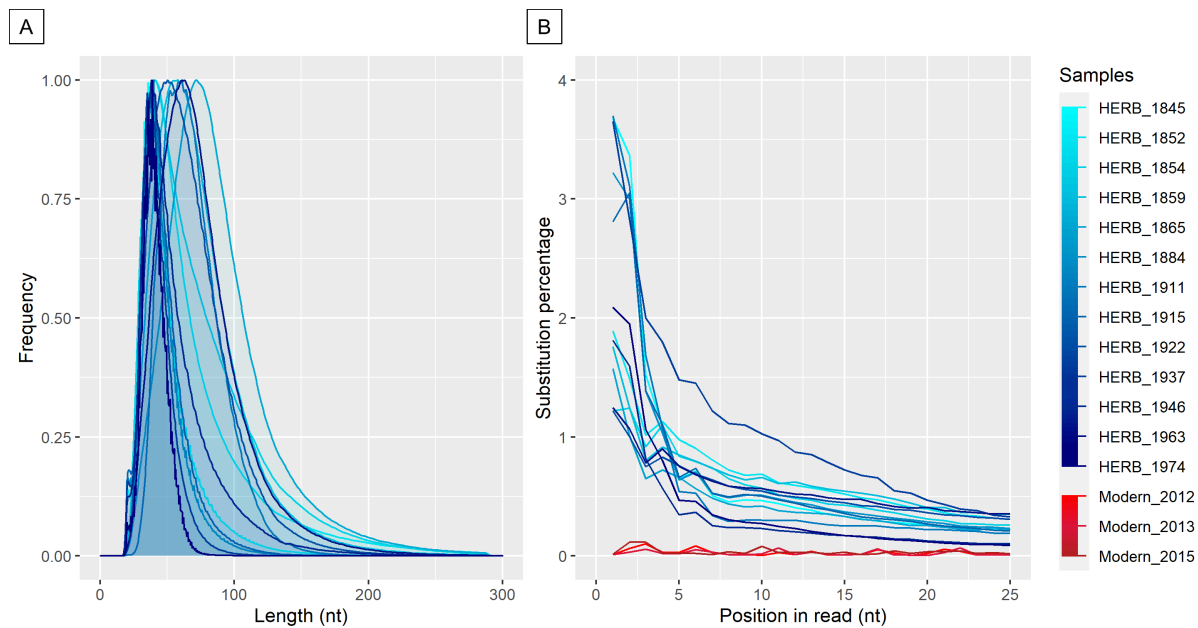

296

297 **Fig 1. Post-mortem DNA damage patterns measured on reads mapping to the *Xci* chromosome.** (A) Fragment  
298 length distribution (nt: nucleotides; relative frequency in arbitrary units). (B) G>A substitution percentage of the  
299 first 25 nucleotides from the 3' end of the 13 historical genomes (blue lines, light to dark gradient from the oldest  
300 to the youngest) and three modern *Xci* strains (red lines, light to dark gradient from the oldest to the youngest).

301 Similar patterns were obtained for plasmid-like sequences (S1 Fig). Interestingly, significantly lower  
302 deamination rates were observed for BEST protocol (95%CI: 1.27-1.64%, versus 2.71-3.24% for TruSeq  
303 Nano protocol, S2 Fig.). When comparing fragment length categories, the BEST library was enriched  
304 in longer fragments (66-140 nt), while the TruSeq Nano library was enriched in smaller fragments (15-  
305 40 nt and 41-65 nt) (p-value<0.0001 in all cases, aov function, R package, data not shown). Within  
306 each protocol, neither sequence type (aligned on either plasmid or chromosome), nor age, were  
307 associated with fragment length differences. More significantly, within each protocol, a time-  
308 dependency of the deamination rate was observed (p-value<0.0001, S2 Fig). Finally, within each library  
309 construction protocol, deamination rates were significantly higher for plasmid-type sequences (S2 Fig,  
310 p<0.0001 for BEST protocol and p=0.0259 for TruSeq Nano protocol). Examining 5'C>T substitution  
311 rates gave the same results.

312 In the first published HERB\_1937 herbarium sample, a significantly higher terminal substitution rate  
313 was observed for plasmid versus chromosome sequences, irrespective of fragment length (Campos *et*  
314 *al.* 2021). In this study, in addition to deamination rates *per se*, the total number of analyzed reads, as  
315 well as 11 fragment length classes, were taken into account for each sample, within each library  
316 protocol (BEST, TruSeq Nano) and within each sequence type (plasmid, chromosome) (S1 Fig and S2  
317 Table). All the 26 (but one) plasmid-type sequences harbored higher deamination rates, as compared  
318 to their respective chromosome-type sequences.

319 Phylogenetic reconstruction, dating and ancestral geographic state estimation

320 Alignment of the chromosome sequence of the 13 historical genomes and 171 modern genomes (17  
321 modern strains from pathotype A\*, 4 from pathotype A<sup>W</sup> and 150 from pathotype A) allowed for the  
322 identification of 15,292 high-quality SNPs (Single Nucleotide Polymorphisms). ClonalFrameML  
323 identified four major recombining regions (S3 Table), from which 2,285 SNPs were removed from  
324 further inferences. On the 13,007 recombination-free SNPs alignment, a paraphyletic outgroup was  
325 added, formed of *X. a. pv. vasculorum* NCPPB-796 and two strains phylogenetically close to *Xci*, *X. c.*  
326 *pv. cajani* LMG558 and *X. c. pv. clitoriae* LMG9045. A Maximum-Likelihood (ML) phylogeny was built  
327 with RAxML (Stamatakis 2014) and rooted with *X. a. pv. vasculorum* (S3 Fig). Strains from each  
328 pathotype grouped together and formed distinct clades. Clade A\* was at the root of clade *Xci*, while  
329 clade A<sup>W</sup> was a sister-group of clade A. This topology (A\*, (A<sup>W</sup>, A)) was highly supported with  
330 bootstraps values of 100. Clade A displayed three major, highly supported lineages which we named  
331 A1, A2 and A3: lineage A1 corresponds to the main group of strains (lineage A in Patané *et al.* (2019),  
332 DAPC1 in Pruvost *et al.* (2014)), contained ten historical specimens, and has a polytomic structure.  
333 Lineage A2 contains strains from India and Pakistan but also from Senegal and Mali and corresponds  
334 to lineage A2 (Patané *et al.* 2019). Lineage A3 contains seven strains from Bangladesh as well as three  
335 historical specimens from Bangladesh, India, and China (Yunnan). Lineages A2 and A3 both contain  
336 strains classified as DAPC2 by Pruvost *et al.* (2014). Within these lineages, strains mostly grouped  
337 according to their geographic origin, with a few exceptions. Asia is represented in all groups and  
338 subgroups. Historical specimens were mainly clustered with modern strains of the same geographical  
339 origin.

340 The ML tree was used to test the presence of temporal signal (*i.e.*, progressive accumulation of  
341 mutations over time) within the *Xci* clade using three different tests. The linear regression test  
342 between root-to-tip distances and sampling ages displayed a significantly positive slope  
343 (value=36.8x10<sup>-6</sup>, adjusted R<sup>2</sup>=0.0235 with a p-value=0.0209) (Fig 2A). Interestingly, such a pattern was  
344 also conserved at several other internal nodes (S4 Fig). Second, the BEAST inferred root age and  
345 substitution rates of the real *versus* date-randomized datasets exhibited no overlap of the 95% HPD  
346 (Highest Posterior Density) (Fig 2B). Finally, the Mantel test displayed no confounding effect (r=-0.73,  
347 p-value=0.89) between temporal and genetic structures. To specifically evaluate the contribution of  
348 historical genomes to the magnitude of temporal signal, we repeated the above tests on a dataset  
349 containing modern genomes only, producing no temporal signal at the *Xci* clade scale (Fig 2A & B).

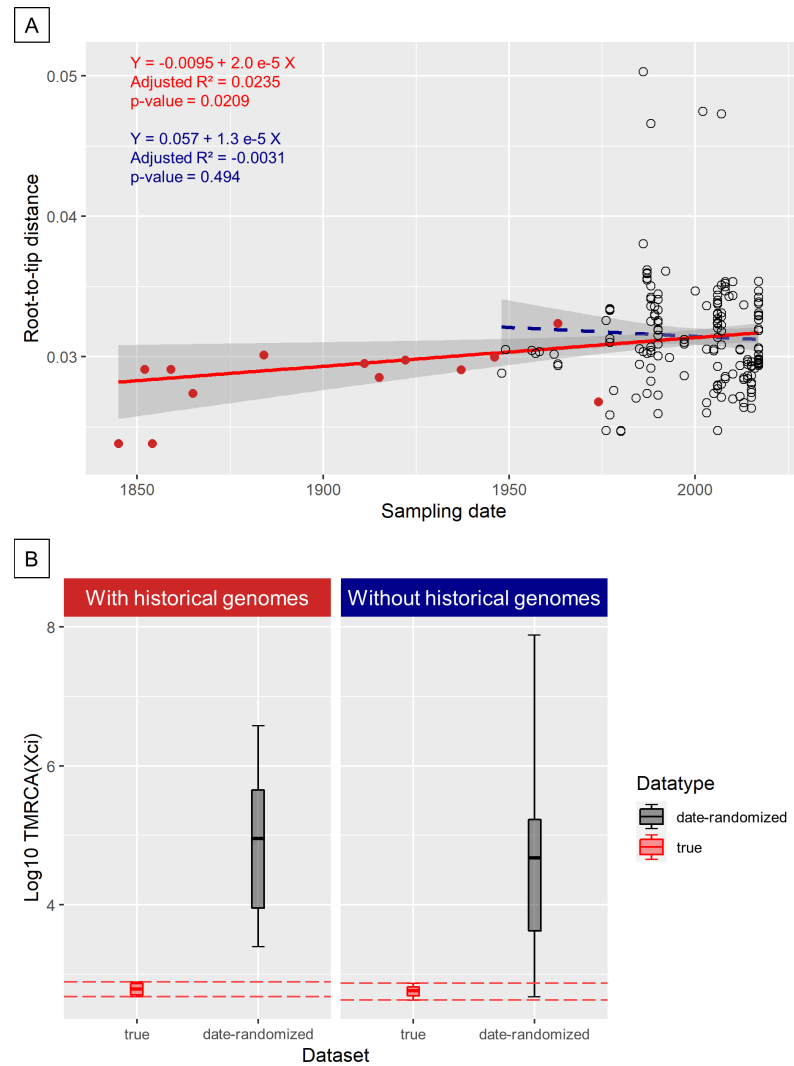

350

351 **Fig 2. Root-to-tip regression and date-randomization temporal test.** (A) Regression lines are plotted in red when  
352 integrating historical genomes, and in blue dots when not. Grey areas indicate 95% confidence intervals.  
353 Associated values are the regression equation, adjusted R<sup>2</sup> (Adj R<sup>2</sup>) and p-value (significant if including historical  
354 genomes). (B) Evaluating temporal signal in the dataset by date-randomization test showed no overlap between  
355 the age of the root estimated from the real dataset (red) and 20 date-randomized datasets (summed up in a  
356 single box, black) when historical genomes were included (left). Vertical bars represent 95% Highest Posterior  
357 Density intervals.

358 A Bayesian time-calibrated tree was built with BEAST (Fig 3), and found globally congruent (similar  
359 topology and node supports) with the ML tree. The root of the *Xci* clade (node at which *Xci* diversified  
360 into numerous pathotypes) was inferred to date to 1218 [95% HPD: 962 - 1437]. We obtained a mean  
361 substitution rate of  $14.30 \times 10^{-8}$  [95% HPD:  $12.47 \times 10^{-8}$  -  $16.14 \times 10^{-8}$ ] per site per year with a standard  
362 deviation for the uncorrelated log-normal clock of 0.507 [95% HPD: 0.428 - 0.594], suggesting low rate  
363 heterogeneity among tree branches. The inferred dates of other internal nodes of interest, including  
364 the MRCA for each of the three pathotypes, as well as for some geographically structured clades, are  
365 given in Table 3.

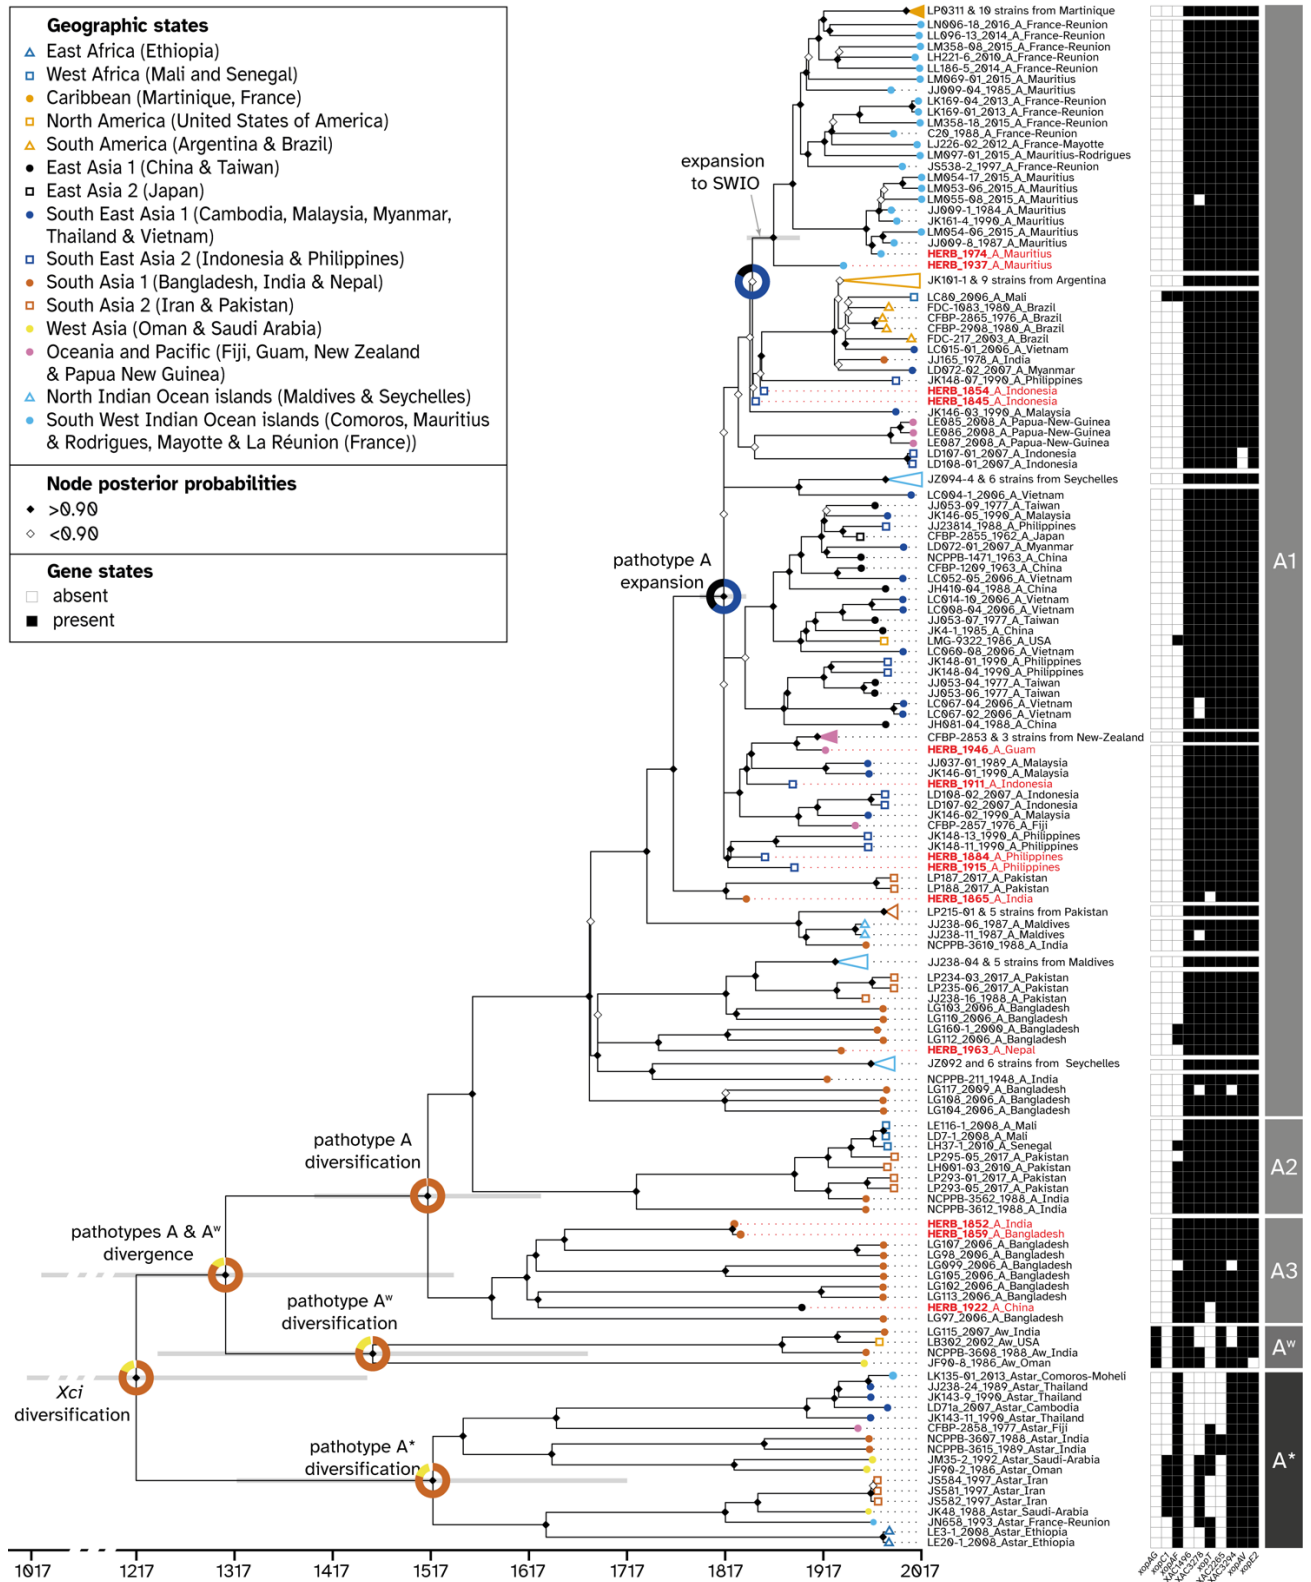

366

367

368

369

370

371

372

373

**Fig 3. Spatiotemporal Bayesian reconstruction of *Xci* evolutionary history.** Dated phylogenetic tree including 13 historical specimens (red labels) and 171 modern strains (black labels) built from 13,007 recombination-free SNPs. Node support values are displayed by diamonds; node bars cover 95% Highest Probability Density of node height. Branch tips are colored according to the sample's geographic origin. Groups of closely related strains were collapsed for better visibility, details of each group can be found in S2 Fig. Reconstructed ancestral geographic states are represented at some nodes of interest with pie charts representing the posterior probability of geographical regions as the origin of the node. Strain labels include strain name, collection year,

374 pathotype and country of origin. Presence and absence of ten variably-present pathogeny-associated genes is  
 375 indicated next to strain labels by black squares and white squares, respectively. Pathotypes and lineages are  
 376 indicated to the right.

377 **Table 3. Inferred spatiotemporal data at major nodes.** Estimations inferred by Patané *et al.* (2019) (in gray  
 378 italics) were indicated when possible. Abbreviations: SWIO, South West Indian Ocean. South Asia 1: Bangladesh,  
 379 India and Nepal; South East Asia 2: Indonesia and Philippines; SWIO islands: Comoros, Mauritius, Rodrigues,  
 380 Mayotte and La Réunion. \* For nodes indicated with an asterisk, reconstructed locations are given for the parent  
 381 node, i.e., the split between the MRCA of the strains from the indicated geographic areas and its closest relative.

| Node                                       | Date<br>[95% Highest Probability Density]         | Location<br>(posterior probability)                       |
|--------------------------------------------|---------------------------------------------------|-----------------------------------------------------------|
| <i>Xci</i> origin                          | -9501 [-13099 – -6446]<br><i>[-12052 – -3851]</i> | South Asia 1 (0.85)<br><i>Bangladesh, India, Pakistan</i> |
| <i>Xci</i> diversification                 | 1218 [962 – 1437]<br><i>[-3648 – 285]</i>         | South Asia 1 (0.81)<br><i>Bangladesh, India, Pakistan</i> |
| <i>Xci</i> (A <sup>w</sup> , A) divergence | 1305 [1061 – 1511]                                | South Asia 1 (0.82)                                       |
| <i>Xci</i> A* diversification              | 1523 [1377 – 1650]                                | South Asia 1 (0.80)<br><i>Iran, Oman, Saudi Arabia</i>    |
| <i>Xci</i> A <sup>w</sup> diversification  | 1461 [1227 – 1675]                                | South Asia 1 (0.80)<br><i>Bangladesh, India, Pakistan</i> |
| <i>Xci</i> A diversification               | 1524 [1390 – 1637]                                | South Asia 1 (0.99)<br><i>Bangladesh, India, Pakistan</i> |
| <i>Xci</i> A - (A2, A1) divergence         | 1570 [1408 – 1684]                                | South Asia 1 (1.00)<br><i>Bangladesh, India, Pakistan</i> |
| <i>Xci</i> A1 diversification              | 1696 [1607 – 1768]                                | South Asia 1 (1.00)<br><i>Bangladesh, India, Pakistan</i> |
| <i>Xci</i> A expansion (polytomy)          | 1829 [1799 – 1845]                                | South East Asia 2 (0.62)                                  |
| <i>Xci</i> A - New Zealand MRCA*           | 1925 [1896 – 1949]                                | South East Asia 2 (0.79)                                  |
| <i>Xci</i> A - South America MRCA*         | 1930 [1907 – 1951]                                | South East Asia 2 (0.96)                                  |
| <i>Xci</i> A - SWIO islands MRCA*          | 1868 [1844 – 1899]                                | South East Asia 2 (0.83)                                  |
| <i>Xci</i> A - Caribbean MRCA*             | 2000 [1991 – 2008]                                | SWIO islands (1.00)                                       |

382 To date the origin of *Xci*, i.e., the date at which it diverged from its closest relatives, a secondary  
 383 alignment was realized with the 13 historical sequences, the 171 modern sequences and the three  
 384 outgroup sequences. A total of 209,306 chromosomal high-quality SNPs was found, 198,249 of which  
 385 were outside recombining regions. The presence of temporal signal was tested as previously  
 386 described. On this dataset, temporal signal was still present at the root of *Xci* clade but the signal  
 387 disappeared at the external node connecting the outgroup, with *X. c. pv. cajani* as *Xci* closest relative  
 388 (root-to-tip regression test: slope value=-4.6x10<sup>-6</sup>, adjusted R<sup>2</sup>=0.0006 with a p-value=0.293; date-  
 389 randomization test: overlapping of the 95% HPD of the root age (S5 Fig); Mantel's test: r=0.04, p-  
 390 value=0.09). As the prerequisite for tip-dating was not met, we realized a rate-dating analysis



391 integrating the mean substitution rate inferred in the tip-dating calibration. The node date at which  
392 *Xci* split from other *Xanthomonas citri* pathovars was inferred to -9501 [95% HPD: -13099 - -6446].

393 In order to infer ancestral location state at nodes, geographic signal in the dataset must first be  
394 detected. By measuring the association index between topology and the location trait data on both  
395 the real tree and 1,000 location-randomized trees, our results highlighted the existence of a non-  
396 random association between spatial and phylogenetic structure ( $p\text{-value} < 0.0001$ ). A discrete  
397 phylogeographic analysis was therefore run with BEAST (Fig 3, Table 3), inferring a highly-supported  
398 South Asia 1 (Bangladesh, India and Nepal) origin where *Xci* split from its *Xanthomonas citri* relatives  
399 and then diversified through its three lineages A\*, A<sup>W</sup> and A. All of them, comprising A1, A2 and A3  
400 lineages included in A, were also inferred to have diversified in the same South Asia 1 region. In the  
401 lineage A1, the polytomy was inferred to have a Southeast Asia 2 (Indonesia or Philippines) origin  
402 (node support of 1, state posterior probability of 0.62). Southeast Asia 2 origin was also inferred for  
403 the lineages composed of: 1) all New Zealand strains (herbarium specimen HERB\_1946\_A\_Guam at  
404 the root); 2) all Argentina strains (with HERB\_1854\_A\_Indonesia and HERB\_1845\_A\_Indonesia  
405 branching closely) and 3) nearly all strains from the SWIO islands and from Martinique (with  
406 HERB\_1974\_A\_Mauritius and HERB\_1937\_A\_Mauritius at their root).

#### 407 Pathogenicity-associated genes content

408 We investigated the presence or absence of 144 pathogenicity-associated genes (S4 Table) under a  
409 mapping approach. The twenty-four genes coding for the type III secretion system (T3SS) were present  
410 in all *Xci* strains. Of the 66 T3E genes tested, we found 32 present and 28 absent in all *Xci* strains,  
411 whereas 6 were of variable presence. In addition, among 54 genes potentially involved in virulence  
412 but not necessarily dependent on the T3SS, only 4 were of variable presence in *Xci*, the 50 others being  
413 systematically present. The ten identified variable virulence factors were *xopAF*, *xopAG*, *xopAV*, *xopC1*,  
414 *xopE*, *xopT*, XAC1496, XAC2265/*held*, XAC3278 and XAC3294 (Fig 3 & S5 Table). In general variation  
415 was localized in the “distant” branches of the tree, and concerned strains from pathotypes A\* and A<sup>W</sup>.  
416 Conversely, strains belonging to pathotype A were rather homogenous in their pathogenicity factor  
417 contents.

#### 418 Discussion

419 In this study, we successfully reconstructed the genome of 13 *Xci* historical strains from herbarium  
420 material collected between 1845 and 1974, which we compared with a set of 171 modern genomes  
421 representative of the bacterial global diversity, 57 of them having been specifically generated for this  
422 study. A better understanding of *Xci* evolutionary history is a subject of great interest since it may help

423 deciphering how bacterial pathogens specialize on their hosts and diversify while expanding their  
424 geographical range.

425 At a molecular level, the analysis of historical genomes was highly informative. First of all, assessment  
426 of *post-mortem* DNA degradation patterns specific to ancient DNA, such as fragmentation and  
427 deamination, confirmed the historical nature of the reconstructed genomes. Terminal deamination  
428 values, consistent with those of Weiss *et al.* (2016) herbarium samples (roughly, between 1.5 and  
429 5.0%), were higher for plasmidic versus chromosomal sequences, possibly due to chromosome-  
430 specific cytosine methylation patterns (discussed in (Campos *et al.* 2021)). Different deamination  
431 values were also observed between library protocols. The usage of specific DNA polymerases  
432 incapable of recovering uracils during library amplification (Kistler *et al.* 2017), or specific bead-  
433 purifications resulting in longer fragment size enrichment (as observed in our study with the BEST  
434 protocol), could lead to the observation of lower deamination rates. Finally, for each protocol we  
435 showed for the first time an age-dependent deamination for bacterial DNA from herbarium material,  
436 as described elsewhere for nuclear and chloroplastic plant DNA (Weiss *et al.* 2016).

437 Adopting a shotgun-based deep sequencing strategy revealed between 0.8% to 25.5% of endogenous  
438 *Xci* DNA amongst the 13 historical samples, a wide variation falling in the range of previous studies  
439 that attempted to retrieve non vascular pathogen DNA from infected herbarium leaves (Martin *et al.*  
440 2013, Yoshida *et al.* 2015, Yoshida *et al.* 2013). We aligned the 13 historical genomes with 171 modern  
441 representatives of the bacterial global diversity, and built a phylogenetic tree from the chromosome-  
442 wide non-recombining SNPs. This tree confidently associated the pathotypes to be monophyletic  
443 groups, and displayed a (A\*, (A<sup>w</sup>, A)) topology, as previously reported from genome-wide SNPs  
444 (Gordon *et al.* 2015) and unicopy gene families analyses (Patané *et al.* 2019). Interestingly, the  
445 relationships inside the pathotype A (A3, (A2, A1)) agreed with the former analysis but not the latter,  
446 whose discrepancy could be explained by the under-representation of A3 lineage (only  
447 LG98\_2006\_A\_Bangladesh present). Globally, the observed geographic clustering inside the  
448 pathotype A clade is consistent with previous studies (Patané *et al.* 2019, Pruvost *et al.* 2014, Richard  
449 *et al.* 2021). Clade A1 had a somehow polytomic structure (most lineages seem to have branched from  
450 a single ancestor at the same moment). This can either be the result of a rapid and synchronous  
451 expansion of *Xci* in contrasted environments, leading to the divergence and maintenance of multiple  
452 lineages, or of an artefact of building topologies with insufficient data, when lack of information does  
453 not allow to differentiate distinct divergence events (Lin *et al.* 2011). Our datation (see below) of the  
454 beginning of the A1 diversification fits with the first scenario, but as many nodes in the A1 cluster are  
455 not well supported (white diamonds in Fig 3) we cannot conclude.

456 The presence of temporal structure is an essential prerequisite to perform tip-calibrated inferences  
457 (Drummond *et al.* 2002, Drummond *et al.* 2003, Rieux *et al.* 2016a). While the dataset containing  
458 contemporary genomes only (1948 - 2017) did not reveal the existence of any measurably evolving  
459 population, inclusion of the 13 historical genomes (1845 - 1974) brought the required temporal signal  
460 within the *Xci* clade. This allowed us building a time-calibrated phylogeny without making any  
461 underlying assumption on the age of any node in the tree, nor on the rate of evolution and proposing  
462 new evolutionary scenarios for the origin and diversification of the pathogen. To our knowledge, this  
463 is the first study attempting to elucidate the evolutionary history of a bacterial crop pathogen at such  
464 a global scale using herbarium specimens. Previous ones did not use historical strains (Patané *et al.*  
465 2019), focused on a recent and local emergence (Campos *et al.* 2021), or were limited by the  
466 exploitation of a few partial genetic markers only (Li *et al.* 2007).

467 We inferred a mean substitution rate of  $14.30 \times 10^{-8}$  [95% HPD:  $12.47 \times 10^{-8}$  -  $16.14 \times 10^{-8}$ ] substitutions  
468 per site per year, a value  $\sim 1.5$ x faster than the one ( $9.4 \times 10^{-8}$  [95% HPD:  $7.3 \times 10^{-8}$  -  $11.4 \times 10^{-8}$ ]) obtained  
469 by our team on a single lineage within the pathotype A clade of *Xci*, at the local scale of the South  
470 West Indian Ocean islands (Campos *et al.* 2021). We dated the MRCA of all *Xci* strains, the node leading  
471 to bacterial diversification, to the beginning of the 13<sup>th</sup> century (1218 [95% HPD: 962 - 1437]), a much  
472 more recent timespan than the one [-3648 - 285] inferred previously (Patané *et al.* 2019). The  
473 discrepancy between those estimates probably arises from differences in the considered molecular  
474 dating methodologies. Indeed, their molecular clock was calibrated by applying a prior on both the  
475 rate of evolution (estimated on house-keeping genes of non-*Xci* *Xanthomonas* species) and the age of  
476 a node external to the *Xci* clade (indirectly deriving from the same rate of evolution), while the  
477 methodology used in our work makes use of the age of the strains only, a method shown to yield far  
478 more accurate and robust estimates (Ho *et al.* 2008, Rieux *et al.* 2016a, Rieux *et al.* 2014). In addition  
479 of dating the emergence of the three *Xci* lineages A\*, A<sup>W</sup> & A, we also inferred the ones of  
480 geographically structured lineages such as the one in New Zealand in 1925 [95% HPD: 1896 - 1949], in  
481 South America in 1930 [95% HPD: 1907 - 1951] or in Martinique in 2000 [95% HPD: 1991 - 2008] with  
482 values always predating disease first reports made in 1937 (Dye 1969), 1957 (Rossetti 1977), and 2014  
483 (Richard *et al.* 2016), respectively. Finally, as the divergence between a pathogen and its closest known  
484 relative places a maximum bound on the timing of its emergence (Duchêne *et al.* 2020), we included  
485 three outgroup sequences, of which *X. c. pv. cajani*, a pathogen of the *Fabaceae* plant family, was the  
486 first to branch out of the *Xci* clade. As the inclusion of divergent outgroup genomes precluded the  
487 application of tip-dating methodology we extrapolated the rate of substitution previously estimated  
488 within the *Xci* clade to date the split between *Xci* and *X. c. pv. cajani* to -9501 [95% HPD: -13099 - -

489 6446], a value which partly overlap with the inferred interval of [-12052 - -3851] found by Patané *et*  
490 *al.* (2019), although on a more restrained length of time.

491 Our phylogeographic analysis inferred an origin and diversification of *Xci* in an area of South Asia  
492 neighboring to Bangladesh, India and Nepal, consistently with previous reconstructions and  
493 estimations based on genetic diversity (Gordon *et al.* 2015, Patané *et al.* 2019, Pruvost *et al.* 2014). It  
494 also corresponds to the area of origin of the *Citrus* genus, which is believed to have emerged within  
495 the southern foothills of the Himalayas (including Assam, Western Yunnan and Northern Myanmar) 6  
496 to 8 Mya (Wu *et al.* 2018). Our temporal calibrations indicate a mean age of 11.5 ky for the origin of  
497 *Xci*, a period which coincides with the beginning of the Holocene (~9700 - present) (Walker *et al.*  
498 2009) following the Bølling-Allerød warming global event (~12700 - -10900) (Rasmussen *et al.* 2006).  
499 Such warmer and wetter climates could have facilitated plant expansion into new areas previously  
500 occupied by ice such as the mountainous regions and the northern parts of South Asia (Staubwasser  
501 *et al.* 2006). This was followed by the development of societies and agriculture in Northern India and  
502 in China during which movements of plants between and outside these regions may have gathered  
503 favorable conditions for *Xci* emergence on *Citrus* through bacterial host jump, as previously proposed  
504 (Patané *et al.* 2019). The diversification of *Xci* was dated to the early 13<sup>th</sup> century in its area of origin,  
505 which was crossed at the time by the Southern Silk Road (Talon *et al.* 2020), linking Eastern and  
506 Western civilizations through trading. The westward commerce of goods, including citrus, which have  
507 been found in Mediterranean countries since -500 (Zech-Matterne *et al.* 2017), as well as the breeding  
508 of citrus varieties for cooking and for raw eating (Talon *et al.* 2020), could have dispersed and isolated  
509 the pathogen into its three known pathotypes. More recent global changes observed between the  
510 17<sup>th</sup> and 20<sup>th</sup> centuries, such as the spice trade and the development of a worldwide colonial  
511 agriculture might also be important factors in the apparently intense diversification of genotypes (and  
512 their global spread) (Campos *et al.* 2021).

513 We based our analysis of the contents in virulence-related genes on lists of proven and hypothetical  
514 factors, a large part of which are T3SS elements and T3E. As expected, and as reported previously all  
515 *Xci* strains contained genes for a full type III secretion apparatus and for a large number of T3E: with  
516 32 genes it is larger than previously reported (Escalon *et al.* 2013), mostly because new (often  
517 hypothetical) genes were described since then (Teper *et al.* 2016). Variation was detected for six T3E  
518 among *Xci* (detailed below). Factors not related to the T3SS were also assessed: we confirmed that  
519 most are present in all of the strains, with variation concerning four of them.

520 Inconsistencies with other works can be due to our identification strategy (mapping on more than 75%  
521 of the CDS). For example, XAC3278 (XAC\_RS16605) was considered to be present in all strains by

522 Patané *et al.* (2019), but we found that there can be two paralogs of the gene. One is distant (65%  
523 nucleotidic identity) from the functionally demonstrated copy but is present in all strains, while the  
524 other, 100% homologous to XAC3278, is only present in some strains. Similarly, we found variability  
525 in the length of homologues to XAC2265 (XAC\_RS11510) between strains, some being truncated of  
526 more than 30% of their length. Finally, *xopF1* is pseudogenized, and probably not functional (Jalan *et*  
527 *al.* 2013). These results confirm the general tendency of “core sets of genes” to be reduced to nothing  
528 when enough strains are analyzed and that the concept of core effectome is not especially relevant  
529 for *Xanthomonas* at the genus level (Roux *et al.* 2015).

530 Variation in some virulence factors (for example, *xopE2*, *xopAV*, XAC3294) was anecdotal, concerning  
531 only one or a few strains. In others cases their distribution was found to be more or less clade-  
532 dependent: *xopAG* is present only in pathotype A<sup>w</sup> strains, as expected (Rybak *et al.* 2009). *XopC1* is  
533 present in a few A\* strains. XAC1496 is specifically absent from all A\* strains, suggesting an acquisition  
534 during the pathotype differentiation process. *XopAF* is present only in the deeply rooted branches of  
535 the tree, suggesting a loss of the effector for strains of clade A1. XAC2265 is absent from A\* strains  
536 except for two of them, suggesting reacquisition of this factor. Conversely, XAC3278 and *xopT* seem  
537 to have been lost several times in the recent past.

538 Herbarium samples were not different in their effector contents from their close phylogenetic  
539 relatives, indicating that most of the effector shuffling process occurred before the 1850s. This is  
540 consistent with evolutionary hypotheses that postulate that fundamental factors of pathogenicity (in  
541 our case the type III secretion apparatus and probably many non-T3 factors) are acquired early in the  
542 evolutionary history of plant-associated bacteria, providing a general adaptation to interactions with  
543 plants, with a subsequent host specialization (and differentiation in further clades) correlated to  
544 variable T3E contents and coevolutionary arms race (Hajri *et al.* 2009, Ma *et al.* 2006, Merda *et al.*  
545 2017).

546 Our work presents two main limitations. First, although with 163 genomes our dataset displayed the  
547 best representation of pathotype A genetic diversity published to date, the reconstructed  
548 phylogenetic tree exhibits high level of imbalance (with only 17 and 4 A\* and A<sup>w</sup> genomes,  
549 respectively), a property previously shown to lead to reduced accuracy or precision of phylogenetic  
550 timescale estimates (Duchêne *et al.* 2015a). Bias in representation of populations, such as  
551 overrepresentation of one compared to the others or the absence of representants from the true  
552 founder lineage, can also lead to the reconstruction of ancestral state tending to correspond to the  
553 oversampled population rather than the true founder lineage (Rasmussen *et al.* 2021). Although this  
554 feature arises from the fact that *Xci* worldwide expansion mostly involved pathotype A strains (Pruvost

555 *et al.* 2014), future work should aim to better characterize the genomic diversity of A\* and A<sup>W</sup> strains.  
556 Secondly, as gene content variation analysis was performed by mapping reads to reference sequences,  
557 we were unable to identify potential genomic rearrangements among strains, a process known to be  
558 frequent within *Xanthomonas* species (Jacques *et al.* 2016, Merda *et al.* 2017, Richard *et al.* 2022).  
559 Similarly, this approach impeded us from identifying genetic content absent from the reference  
560 sequences. To overcome those limitations and better recover pathotype-specific genes, comparative  
561 genomic analysis based on *de novo* assembly and/or without *a priori* on the targeted genes would be  
562 interesting to perform.

563 To conclude, our study emphasizes how historical genomes from herbarium samples can provide a  
564 wealth of genetic and temporal information on bacterial crop pathogens evolution. Similar studies  
565 could be applied to other plant pathogens to infer the temporal dynamic of their populations and  
566 elucidate their evolutionary history with more resolute estimations, which in turn may provide clues  
567 to improve disease monitoring and achieve sustainable control.

## 568 Acknowledgments

569 We are grateful to P. Lefeuvre, D. Richard, F. Balloux, V. Llaurens, R. Debruyne & Á. Pérez-Quintero for  
570 valuable comments and discussions. We thank L Bui Thi Ngoc (SOFRI, Viet Nam), B. Canteros (INTA,  
571 Argentina), B. Carter (FERA, UK), R. Davis (NASQ, Australia), A. Hamza (INRAPE, the Comoros), G.  
572 Johnson (Horticulture4Development, Australia), N. Le Mai (PPRI, Viet Nam), W. Wu (National Chung  
573 Hsing University, Taiwan) and M. Zakria (NARC, Pakistan) for providing citrus canker lesions and/or  
574 bacterial strains. We also thank Meghann Toner, collections management, Department of Botany,  
575 National Museum of Natural History, Washington, D.C., USA for allowing us to consult and sample  
576 Citrus specimens at the U.S. National Herbarium. We also thank L Bui Thi Ngoc, B. Canteros, B. Carter,  
577 R. Davis, A. Hamza, G. Johnson, N. Le Mai, W. Wu and M. Zakria for providing diseased citrus material  
578 and/or bacterial strains. We would also like to acknowledge herbarium curators who allowed us to  
579 collect samples not included in this study. Collection of any plant material used in this study complies  
580 with institutional, national, and international guidelines. Computational work was performed on the  
581 CIRAD - UMR AGAP HPC data center of the South Green bioinformatics platform  
582 (<http://www.southgreen.fr/>) and MESO@LR-Platform at the University of Montpellier  
583 (<https://hal.umontpellier.fr/MESO>). This work was conducted on the Plant Protection Platform (3P,  
584 IBISA).

## 585 Funding

586 This work was financially supported by Agence Nationale de la Recherche (JCJC MUSEOBACT contrat  
587 ANR-17-CE35-0009-01), the European Regional Development Fund (ERDF contract GURDT I2016-  
588 1731-0006632), Région Réunion, the Agropolis Foundation (Labex Agro – Montpellier, E-SPACE project  
589 number 1504-004, MUSEOVIR project number 1600-004), the SYNTHESYS Project  
590 <http://www.synthesys.info/> (grants GB-TAF-6437 and GB-TAF-7130) financed by European  
591 Community Research Infrastructure Action under the FP7 "Capacities" Program & CIRAD/AI-CRESI-  
592 3/2016. PhD of P.C. was co-funded by ED 227, Muséum national d'Histoire naturelle and Sorbonne  
593 Université, Ministère de l'Enseignement Supérieur, de la Recherche et de l'Innovation.

## 594 Conflict of interest disclosure

595 The authors declare they have no conflict of interest relating to the content of this article.

## 596 Data, script and code availability

597 The authors confirm that all data used in this study are fully available without restriction. Both  
598 historical and modern raw reads were deposited to the Sequence Read Archive (under accession

599 numbers listed in S1 Table). Accession numbers of any previously published data used in this study are  
600 also listed in S1 Table.

## 601 Supplementary information

602 S1 Fig. Post-mortem DNA damage patterns on Xci plasmids pXAC33 and pXAC64.

603 S2 Fig. Deamination rate (in percentage) at terminal position from the 3' end (G to A substitutions) as  
604 a function of the collection year for the 13 Xci genomes reconstructed from herbarium specimens.

605 S3 Fig. Maximum Likelihood (ML) phylogenetic tree of historical and modern Xci genomes

606 S4 Fig. Root-to-tip regression temporal test visualised on online tool PhyloStemS

607 S5 Fig. Root-to-tip regression and date-randomisation temporal test results when performed on the  
608 dataset including outgroups

609 S1 Table. General characteristics of the historical and modern strains of the study

610 S2 Table. Summary of mapping, depth, coverage and damage statistics for the 13 historic Xci plasmids  
611 pXAC33 and pXAC64.

612 S3 Table. Recombining regions among 185 historical or modern Xci strains

613 S4 Table. List and presence status of 144 pathogenicity-associated genes investigated among 184  
614 historical or modern Xci strains

615 S5 Table. Coverage (in percentage) of the 10 pathogenicity-associated genes of variable presence  
616 investigated among 184 historical or modern Xci strains

617



## 618 References

- 619 Al Rwahnih M, Rowhani A & Golino D (2015). First report of grapevine red blotch-associated virus in archival  
620 grapevine material from Sonoma County, California. **Plant Dis.** 99(6): 895. [https://doi.org/10.1094/PDIS-12-14-](https://doi.org/10.1094/PDIS-12-14-1252-PDN)  
621 [1252-PDN](https://doi.org/10.1094/PDIS-12-14-1252-PDN)
- 622 Anderson PK, Cunningham AA, Patel NG, Morales FJ, Epstein PR & Daszak P (2004). Emerging infectious  
623 diseases of plants: pathogen pollution, climate change and agrotechnology drivers. **Trends Ecol. Evol.** 19(10):  
624 535-544. <https://doi.org/10.1016/j.tree.2004.07.021>
- 625 Ayres DL, Darling A, Zwickl DJ, Beerli P, Holder MT, Lewis PO, Huelsenbeck JP, Ronquist F, Swofford DL,  
626 Cummings MP, Rambaut A & Suchard MA (2012). BEAGLE: An application programming interface and high-  
627 performance computing library for statistical phylogenetics. **Syst. Biol.** 61(1): 170-173.  
628 <https://doi.org/10.1093/sysbio/syr100>
- 629 Bernardes MFF, Pazin M, Pereira LC & Dorta DJ (2015). Impact of pesticides on environmental and human  
630 health. In "Toxicology studies-cells, drugs and environment". (Andreazza AC & Scola G, Eds.) Rijeka, Croatia,  
631 InTech. pp 195-233. <https://doi.org/10.5772/58714>.
- 632 Biek R, Pybus OG, Lloyd-Smith JO & Didelot X (2015). Measurably evolving pathogens in the genomic era.  
633 **Trends Ecol. Evol.** 30(6): 306-313. <https://doi.org/10.1016/j.tree.2015.03.009>
- 634 Bolger AM, Lohse M & Usadel B (2014). Trimmomatic: a flexible trimmer for Illumina sequence data.  
635 **Bioinformatics** 30(15): 2114-2120. <https://doi.org/10.1093/bioinformatics/btu170>
- 636 Broad Institute. Picard Tools. Accessed November 2020, <http://broadinstitute.github.io/picard/>
- 637 Buttner D (2016). Behind the lines-actions of bacterial type III effector proteins in plant cells. **FEMS Microbiol.**  
638 **Rev.** 40(6): 894-937. <https://doi.org/10.1093/femsre/fuw026>
- 639 Campos PE, Groot Crego C, Boyer K, Gaudeul M, Baider C, Richard D, Pruvost O, Roumagnac P, Szurek B, Becker  
640 N, Gagnevin L & Rieux A (2021). First historical genome of a crop bacterial pathogen from herbarium specimen:  
641 Insights into citrus canker emergence. **PLoS Pathog.** 17(7): e1009714.  
642 <https://doi.org/10.1371/journal.ppat.1009714>
- 643 Carøe C, Gopalakrishnan S, Vinner L, Mak SST, Sinding MHS, Samaniego JA, Wales N, Sicheritz-Pontén T &  
644 Gilbert MT (2017). Single-tube library preparation for degraded DNA. **Methods Ecol. Evol.** 9: 410-419.  
645 <https://doi.org/10.1111/2041-210X.12871>
- 646 da Silva AC, Ferro JA, Reinach FC, Farah CS, Furlan LR, Quaggio RB, Monteiro-Vitorello CB, Van Sluys MA,  
647 Almeida NF, Alves LM, do Amaral AM, Bertolini MC, Camargo LE, Camarotte G, Cannavan F, Cardozo J,  
648 Chambergio F, Ciapina LP, Cicarelli RM, Coutinho LL, Cursino-Santos JR, El-Dorry H, Faria JB, Ferreira AJ, Ferreira  
649 RC, Ferro MI, Formighieri EF, Franco MC, Greggio CC, Gruber A, Katsuyama AM, Kishi LT, Leite RP, Lemos EG,  
650 Lemos MV, Locali EC, Machado MA, Madeira AM, Martinez-Rossi NM, Martins EC, Meidanis J, Menck CF,  
651 Miyaki CY, Moon DH, Moreira LM, Novo MT, Okura VK, Oliveira MC, Oliveira VR, Pereira HA, Rossi A, Sena JA,  
652 Silva C, de Souza RF, Spinola LA, Takita MA, Tamura RE, Teixeira EC, Tezza RI, Trindade dos Santos M, Truffi D,  
653 Tsai SM, White FF, Setubal JC & Kitajima JP (2002). Comparison of the genomes of two *Xanthomonas*  
654 pathogens with differing host specificities. **Nature** 417(6887): 459-463. <https://doi.org/10.1038/417459a>
- 655 Dabney J, Meyer M & Paabo S (2013). Ancient DNA damage. **Cold Spring Harb. Perspect. Biol.** 5(7): a012567.  
656 <https://doi.org/10.1101/cshperspect.a012567>
- 657 Dark P & Gent H (2001). Pests and diseases of prehistoric crops: a yield 'honeymoon' for early grain crops in  
658 Europe? **Oxford J. Archaeol.** 20(1): 59-78. <https://doi.org/10.1111/1468-0092.00123>

- 659 DePristo MA, Banks E, Poplin R, Garimella KV, Maguire JR, Hartl C, Philippakis AA, del Angel G, Rivas MA, Hanna  
660 M, McKenna A, Fennell TJ, Kernytsky AM, Sivachenko AY, Cibulskis K, Gabriel SB, Altshuler D & Daly MJ (2011).  
661 A framework for variation discovery and genotyping using next-generation DNA sequencing data. **Nat. Genet.**  
662 43(5): 491-498. <https://doi.org/10.1038/ng.806>
- 663 Didelot X & Wilson DJ (2015). ClonalFrameML: Efficient inference of recombination in whole bacterial  
664 genomes. **PLoS Comput. Biol.** 11(2). <https://doi.org/10.1371/journal.pcbi.1004041>
- 665 DOE Joint Genome Institute. BBTools. Accessed November 2020, [https://jgi.doe.gov/data-and-tools/software-](https://jgi.doe.gov/data-and-tools/software-tools/)  
666 [tools/](https://jgi.doe.gov/data-and-tools/software-tools/)
- 667 Doizy A, Prin A, Cornu G, Chiroleu F & Rieux A (2020). Phylostems: a new graphical tool to investigate temporal  
668 signal of heterochronous sequences at various evolutionary scales. **bioRxiv.**  
669 <https://doi.org/10.1101/2020.10.19.346429>
- 670 Drummond AJ, Nicholls GK, Rodrigo AG & Solomon W (2002). Estimating mutation parameters, population  
671 history and genealogy simultaneously from temporally spaced sequence data. **Genetics** 161(3): 1307-1320.  
672 <https://doi.org/10.1093/genetics/161.3.1307>
- 673 Drummond AJ, Pybus OG, Rambaut A, Forsberg R & Rodrigo AG (2003). Measurably evolving populations.  
674 **Trends Ecol. Evol.** 18(9): 481-488. [https://doi.org/10.1016/S0169-5347\(03\)00216-7](https://doi.org/10.1016/S0169-5347(03)00216-7)
- 675 Drummond AJ & Rambaut A (2007). BEAST: Bayesian evolutionary analysis by sampling trees. **BMC Evol. Biol.**  
676 7: 214. <https://doi.org/10.1186/1471-2148-7-214>
- 677 Duchêne D, Duchêne S & Ho SYW (2015a). Tree imbalance causes a bias in phylogenetic estimation of  
678 evolutionary timescales using heterochronous sequences. **Mol. Ecol. Resour.** 15(4): 785-794.  
679 <https://doi.org/10.1111/1755-0998.12352>
- 680 Duchêne S, Duchêne D, Holmes EC & Ho SYW (2015b). The performance of the date-randomization test in  
681 phylogenetic analyses of time-structured virus data. **Mol. Biol. Evol.** 32(7): 1895-1906.  
682 <https://doi.org/10.1093/molbev/msv056>
- 683 Duchêne S, Ho SYW, Carmichael AG, Holmes EC & Poinar H (2020). The recovery, interpretation and use of  
684 ancient pathogen genomes. **Curr. Biol.** 30(19): R1215-1231. <https://doi.org/10.1016/j.cub.2020.08.081>
- 685 Dye DW (1969). Eradicating citrus canker from New Zealand. **N. Z. J. Agric. Res.** 118(2): 20-21.
- 686 Escalon A, Javegny S, Vernière C, Noël LD, Vital K, Poussier S, Hajri A, Boureau T, Pruvost O, Arlat M & Gagnevin  
687 L (2013). Variations in type III effector repertoires, pathological phenotypes and host range of *Xanthomonas*  
688 *citri* pv. *citri* pathotypes. **Mol. Plant Pathol.** 14(5): 483-496. <https://doi.org/10.1111/mpp.12019>
- 689 Gordon JL, Lefeuvre P, Escalon A, Barbe V, Curveiller S, Gagnevin L & Pruvost O (2015). Comparative genomics  
690 of 43 strains of *Xanthomonas citri* pv. *citri* reveals the evolutionary events giving rise to pathotypes with  
691 different host ranges. **BMC Genomics** 16: 1098. <https://doi.org/10.1186/s12864-015-2310-x>
- 692 Gottwald TR, Graham JH & Schubert TS (2002). Citrus canker: The pathogen and its impact. **Plant Health Prog.**  
693 3(1): 15. <https://doi.org/10.1094/php-2002-0812-01-rv>
- 694 Graham JH, Gottwald TR, Cubero J & Achor DS (2004). *Xanthomonas axonopodis* pv. *citri*: factors affecting  
695 successful eradication of citrus canker. **Mol. Plant Pathol.** 5(1): 1-15. [https://doi.org/10.1046/j.1364-](https://doi.org/10.1046/j.1364-3703.2004.00197.x)  
696 [3703.2004.00197.x](https://doi.org/10.1046/j.1364-3703.2004.00197.x)
- 697 Hajri A, Brin C, Hunault G, Lardeux F, Lemaire C, Manceau C, Boureau T & Poussier S (2009). A "repertoire for  
698 repertoire" hypothesis: repertoires of type three effectors are candidate determinants of host specificity in  
699 *Xanthomonas*. **PLoS One** 4(8): e6632. <https://doi.org/10.1371/journal.pone.0006632>

- 700 Ho SYW, Saarma U, Barnett R, Haile J & Shapiro B (2008). The effect of inappropriate calibration: three case  
701 studies in molecular ecology. **PLoS One** 3(2). <https://doi.org/10.1371/journal.pone.0001615>
- 702 Jacques MA, Arlat M, Boulanger A, Boureau T, Carrère S, Cesbron S, Chen NWG, Cociancich S, Darrasse A,  
703 Denancé N, Fischer-Le Saux M, Gagnevin L, Koebnik R, Lauber E, Noël LD, Pieretti I, Portier P, Pruvost O, Rieux  
704 A, Robène I, Royer M, Szurek B, Verdier V & Vernière C (2016). Using ecology, physiology and genomics to  
705 understand host specificity in *Xanthomonas*: French Network on Xanthomonads (FNX). **Annu. Rev.**  
706 **Phytopathol.** 54(1): 163-187. <https://doi.org/10.1146/annurev-phyto-080615-100147>
- 707 Jalan N, Kumar D, Andrade MO, Yu F, Jones JB, Graham JH, White FF, Setubal JC & Wang N (2013). Comparative  
708 genomic and transcriptome analyses of pathotypes of *Xanthomonas citri* subsp. *citri* provide insights into  
709 mechanisms of bacterial virulence and host range. **BMC Genomics** 14: 551. <https://doi.org/10.1186/1471-2164-14-551>
- 711 Jonsson H, Ginolhac A, Schubert M, Johnson PL & Orlando L (2013). mapDamage2.0: fast approximate Bayesian  
712 estimates of ancient DNA damage parameters. **Bioinformatics** 29(13): 1682-1684.  
713 <https://doi.org/10.1093/bioinformatics/btt193>
- 714 Jun G, Wing MK, Abecasis GR & Kang HM (2015). An efficient and scalable analysis framework for variant  
715 extraction and refinement from population-scale DNA sequence data. **Genome Res.** 25(6): 918-925.  
716 <https://doi.org/10.1101/gr.176552.114>
- 717 Kistler L, Ware R, Smith O, Collins M & Allaby RG (2017). A new model for ancient DNA decay based on  
718 paleogenomic meta-analysis. **Nucleic Acids Res.** 45(11): 6310-6320. <https://doi.org/10.1093/nar/gkx361>
- 719 Lanave C, Preparata G, Saccone C & Serio G (1984). A new method for calculating evolutionary substitution  
720 rates. **J. Mol. Evol.** 20(1): 86-93. <https://doi.org/10.1007/BF02101990>
- 721 Langmead B & Salzberg SL (2012). Fast gapped-read alignment with Bowtie 2. **Nat. Methods** 9(4): 357-U354.  
722 <https://doi.org/10.1038/Nmeth.1923>
- 723 Li H & Durbin R (2009). Fast and accurate short read alignment with Burrows-Wheeler transform.  
724 **Bioinformatics** 25(14): 1754-1760. <https://doi.org/10.1093/bioinformatics/btp324>
- 725 Li W, Song Q, Brlansky RH & Hartung JS (2007). Genetic diversity of citrus bacterial canker pathogens preserved  
726 in herbarium specimens. **P. Natl. Acad. Sci. USA** 104(47): 18427-18432.  
727 <https://doi.org/10.1073/pnas.0705590104>
- 728 Lin GN, Zhang C & Xu D (2011). Polytomy identification in microbial phylogenetic reconstruction. **BMC Syst Biol**  
729 5 Suppl 3: S2. <https://doi.org/10.1186/1752-0509-5-S3-S2>
- 730 Ma W, Dong FF, Stavrinides J & Guttman DS (2006). Type III effector diversification via both pathoadaptation  
731 and horizontal transfer in response to a coevolutionary arms race. **PLoS Genet.** 2(12): e209.  
732 <https://doi.org/10.1371/journal.pgen.0020209>
- 733 Malmstrom CM, Martin MD & Gagnevin L (2022). Exploring the emergence and evolution of plant pathogenic  
734 microbes using historical and paleontological sources. **Annu. Rev. Phytopathol.** 60(1): 187-209.  
735 <https://doi.org/10.1146/annurev-phyto-021021-041830>
- 736 Malmstrom CM, Shu R, Linton EW, Newton L & Cook MA (2007). Barley yellow dwarf viruses (BYDVs)  
737 preserved in herbarium specimens illuminate historical disease ecology of invasive and native grasses. **J. Ecol.**  
738 95(6): 1153-1166. <https://doi.org/10.1111/j.1365-2745.2007.01307.x>
- 739 Martin MD, Cappellini E, Samaniego JA, Zepeda ML, Campos PF, Seguin-Orlando A, Wales N, Orlando L, Ho SY,  
740 Dietrich FS, Mieczkowski PA, Heitman J, Willerslev E, Krogh A, Ristaino JB & Gilbert MT (2013). Reconstructing  
741 genome evolution in historic samples of the Irish potato famine pathogen. **Nat. Commun.** 4: 2172.  
742 <https://doi.org/10.1038/ncomms3172>

- 743 McCann HC (2020). Skirmish or war: the emergence of agricultural plant pathogens. **Curr. Opin. Plant Biol.** 56:  
744 147-152. <https://doi.org/10.1016/j.pbi.2020.06.003>
- 745 Merda D, Briand M, Bosis E, Rousseau C, Portier P, Barret M, Jacques MA & Fischer-Le Saux M (2017).  
746 Ancestral acquisitions, gene flow and multiple evolutionary trajectories of the type three secretion system and  
747 effectors in *Xanthomonas* plant pathogens. **Mol. Ecol.** 26(21): 5939-5952. <https://doi.org/10.1111/mec.14343>
- 748 Mira A, Pushker R & Rodriguez-Valera F (2006). The Neolithic revolution of bacterial genomes. **Trends**  
749 **Microbiol.** 14(5): 200-206. <https://doi.org/10.1016/j.tim.2006.03.001>
- 750 Murray GGR, Wang F, Harrison EM, Paterson GK, Mather AE, Harris SR, Holmes MA, Rambaut A & Welch JJ  
751 (2016). The effect of genetic structure on molecular dating and tests for temporal signal. **Methods Ecol. Evol.**  
752 7(1): 80-89. <https://doi.org/10.1111/2041-210x.12466>
- 753 Parker J, Rambaut A & Pybus OG (2008). Correlating viral phenotypes with phylogeny: Accounting for  
754 phylogenetic uncertainty. **Infect. Genet. Evol.** 8(3): 239-246. <https://doi.org/10.1016/j.meegid.2007.08.001>
- 755 Patané JSL, Martins J, Jr., Rangel LT, Belasque J, Digiampietri LA, Facincani AP, Ferreira RM, Jaciani FJ, Zhang Y,  
756 Varani AM, Almeida NF, Wang N, Ferro JA, Moreira LM & Setubal JC (2019). Origin and diversification of  
757 *Xanthomonas citri* subsp. *citri* pathotypes revealed by inclusive phylogenomic, dating, and biogeographic  
758 analyses. **BMC Genomics** 20(1): 700. <https://doi.org/10.1186/s12864-019-6007-4>
- 759 Pruvost O, Magne M, Boyer K, Leduc A, Tourterel C, Drevet C, Ravigné V, Gagnevin L, Guérin F, Chiroleu F,  
760 Koebnik R, Verdier V & Vernière C (2014). A MLVA genotyping scheme for global surveillance of the citrus  
761 pathogen *Xanthomonas citri* pv. *citri* suggests a worldwide geographical expansion of a single genetic lineage.  
762 **PLoS One** 9(6): e98129. <https://doi.org/10.1371/journal.pone.0098129>
- 763 Quinlan AR & Hall IM (2010). BEDTools: a flexible suite of utilities for comparing genomic features.  
764 **Bioinformatics** 26(6): 841-842. <https://doi.org/10.1093/bioinformatics/btq033>
- 765 Rambaut A, Drummond AJ, Xie D, Baele G & Suchard MA (2018). Posterior summarization in Bayesian  
766 phylogenetics using Tracer 1.7. **Syst. Biol.** 67(5): 901-904. <https://doi.org/10.1093/sysbio/syy032>
- 767 Rasmussen DA & Grunwald NJ (2021). Phylogeographic approaches to characterize the emergence of plant  
768 pathogens. **Phytopathology** 111(1): 68-77. <https://doi.org/10.1094/PHYTO-07-20-0319-FI>
- 769 Rasmussen SO, Andersen KK, Svensson AM, Steffensen JP, Vinther BM, Clausen HB, Siggaard-Andersen ML,  
770 Johnsen SJ, Larsen LB, Dahl-Jensen D, Bigler M, Rothlisberger R, Fischer H, Goto-Azuma K, Hansson ME & Ruth  
771 U (2006). A new Greenland ice core chronology for the last glacial termination. **J. Geophys. Res. Atmos.**  
772 111(D6). <https://doi.org/10.1029/2005jd006079>
- 773 Richard D, Boyer C, Javegny S, Boyer K, Grygiel P, Pruvost O, Rioualec AL, Rakotobe V, Iotti J, Picard R, Vernière  
774 C, Audusseau C, Francois C, Olivier V, Moreau A & Chabirand A (2016). First report of *Xanthomonas citri* pv.  
775 *citri* pathotype A causing Asiatic citrus canker in Martinique, France. **Plant Dis.** 100(9): 1946-1946.  
776 <https://doi.org/10.1094/Pdis-02-16-0170-Pdn>
- 777 Richard D, Pruvost O, Balloux F, Boyer C, Rieux A & Lefevre P (2021). Time-calibrated genomic evolution of a  
778 monomorphic bacterium during its establishment as an endemic crop pathogen. **Mol. Ecol.** 30(8): 1823-1835.  
779 <https://doi.org/10.1111/mec.15770>
- 780 Richard D, Roumagnac P, Pruvost O & Lefevre P (2022). A network approach to decipher the dynamics of  
781 Lysobacteraceae plasmid gene sharing. **Mol. Ecol.**(00): 1-14. <https://doi.org/10.1111/mec.16536>
- 782 Rieux A & Balloux F (2016a). Inferences from tip-calibrated phylogenies: a review and a practical guide. **Mol.**  
783 **Ecol.** 25(9): 1911-1924. <https://doi.org/10.1111/mec.13586>

- 784 Rieux A, Campos P, Duvermy A, Scussel S, Martin D, Gaudeul M, Lefeuvre P, Becker N & Lett JM (2021).  
785 Contribution of historical herbarium small RNAs to the reconstruction of a cassava mosaic geminivirus  
786 evolutionary history. **Sci. Rep.** 11(1): 21280. <https://doi.org/10.1038/s41598-021-00518-w>
- 787 Rieux A, Eriksson A, Li M, Sobkowiak B, Weinert LA, Warmuth V, Ruiz-Linares A, Manica A & Balloux F (2014).  
788 Improved calibration of the human mitochondrial clock using ancient genomes. **Mol. Biol. Evol.** 31(10): 2780-  
789 2792. <https://doi.org/10.1093/molbev/msu222>
- 790 Rieux A & Khatchikian CE (2016b). TIPDATINGBEAST: an R package to assist the implementation of  
791 phylogenetic tip-dating tests using BEAST. **Mol. Ecol. Resour.** 17: 608-613. [https://doi.org/10.1111/1755-  
792 0998.12603](https://doi.org/10.1111/1755-0998.12603)
- 793 Ristaino JB (2020). The importance of mycological and plant herbaria in tracking plant killers. **Front. Ecol. Evol.**  
794 7: 521. <https://doi.org/10.3389/fevo.2019.00521>
- 795 Rossetti V (1977). Citrus Canker in Latin America: a review. Proceedings of the International Society of  
796 Citriculture. 3: 918-924.
- 797 Roux B, Bolot S, Guy E, Denancé N, Lautier M, Jardinaud MF, Fischer-Le Saux M, Portier P, Jacques MA,  
798 Gagnevin L, Pruvost O, Lauber E, Arlat M, Carrère S, Koebnik R & Noël LD (2015). Genomics and transcriptomics  
799 of *Xanthomonas campestris* species challenge the concept of core type III effectome. **BMC Genomics** 16(1):  
800 975. <https://doi.org/10.1186/s12864-015-2190-0>
- 801 Rybak M, Minsavage GV, Stall RE & Jones JB (2009). Identification of *Xanthomonas citri* ssp. *citri* host specificity  
802 genes in a heterologous expression host. **Mol. Plant Pathol.** 10(2): 249-262. [https://doi.org/10.1111/j.1364-  
803 3703.2008.00528.x](https://doi.org/10.1111/j.1364-3703.2008.00528.x)
- 804 Savary S, Willocquet L, Pethybridge SJ, Esker P, McRoberts N & Nelson A (2019). The global burden of  
805 pathogens and pests on major food crops. **Nat. Ecol. Evol.** 3(3): 430-439. [https://doi.org/10.1038/s41559-018-  
806 0793-y](https://doi.org/10.1038/s41559-018-0793-y)
- 807 Saville AC, Martin MD & Ristaino JB (2016). Historic late blight outbreaks caused by a widespread dominant  
808 lineage of *Phytophthora infestans* (Mont.) de Bary. **PLoS One** 11(12): e0168381.  
809 <https://doi.org/10.1371/journal.pone.0168381>
- 810 Schubert M, Lindgreen S & Orlando L (2016). AdapterRemoval v2: rapid adapter trimming, identification, and  
811 read merging. **BMC Res. Notes** 9: 88. <https://doi.org/10.1186/s13104-016-1900-2>
- 812 Schubert TS, Rizvi SA, Sun X, Gottwald TR, Graham JH & Dixon WN (2001). Meeting the challenge of eradicating  
813 Citrus Canker in Florida-again. **Plant Dis.** 85(4): 340-356. <https://doi.org/10.1094/PDIS.2001.85.4.340>
- 814 Smith O, Clapham A, Rose P, Liu Y, Wang J & Allaby RG (2014). A complete ancient RNA genome: identification,  
815 reconstruction and evolutionary history of archaeological Barley Stripe Mosaic Virus. **Sci. Rep.** 4: 4003.  
816 <https://doi.org/10.1038/srep04003>
- 817 Stamatakis A (2014). RAxML version 8: a tool for phylogenetic analysis and post-analysis of large phylogenies.  
818 **Bioinformatics** 30(9): 1312-1313. <https://doi.org/10.1093/bioinformatics/btu033>
- 819 Staubwasser M & Weiss H (2006). Holocene climate and cultural evolution in late prehistoric–early historic  
820 West Asia. **Quat. Res** 66(3): 372-387. <https://doi.org/10.1016/j.yqres.2006.09.001>
- 821 Stukenbrock EH & McDonald BA (2008). The origins of plant pathogens in agro-ecosystems. **Annu. Rev.**  
822 **Phytopathol.** 46(1): 75-100. <https://doi.org/10.1146/annurev.phyto.010708.154114>
- 823 Suchard MA & Rambaut A (2009). Many-core algorithms for statistical phylogenetics. **Bioinformatics** 25(11):  
824 1370-1376. <https://doi.org/10.1093/bioinformatics/btp244>

- 825 Sun X, Stall RE, Jones JB, Cubero J, Gottwald TR, Graham JH, Dixon WN, Schubert TS, Chaloux PH, Stromberg  
826 VK, Lacy GH & Sutton BD (2004). Detection and characterization of a new strain of citrus canker bacteria from  
827 Key/Mexican lime and alemow in South Florida. **Plant Dis.** 88(11): 1179-1188.  
828 <https://doi.org/10.1094/PDIS.2004.88.11.1179>
- 829 Talon M, Caruso M & Gmitter Jr FG, Eds. (2020). "The genus Citrus". Duxford, Elsevier.  
830 <https://doi.org/10.1016/C2016-0-02375-6>
- 831 Teper D, Burstein D, Salomon D, Gershovitz M, Pupko T & Sessa G (2016). Identification of novel *Xanthomonas*  
832 *euvesicatoria* type III effector proteins by a machine-learning approach. **Mol. Plant Pathol.** 17(3): 398-411.  
833 <https://doi.org/10.1111/mpp.12288>
- 834 The Xanthomonas Resource. Accessed December 2021,  
835 <http://internet.myds.me/dokuwiki/doku.php?id=bacteria:t3e:t3e>
- 836 Vernière C, Hartung JS, Pruvost OP, Civerolo EL, Alvarez AM, Maestri P & Luisetti J (1998). Characterization of  
837 phenotypically distinct strains of *Xanthomonas axonopodis* pv. *citri* from Southwest Asia. **Eur. J. Plant Pathol.**  
838 104(5): 477-487. <https://doi.org/10.1023/A:1008676508688>
- 839 Walker M, Johnsen S, Rasmussen SO, Popp T, Steffensen JP, Gibbard P, Hoek W, Lowe J, Andrews J, Bjorck S,  
840 Cwynar LC, Huguenot K, Kershaw P, Kromer B, Litt T, Lowe DJ, Nakagawa T, Newnham R & Schwander J (2009).  
841 Formal definition and dating of the GSSP (Global Stratotype Section and Point) for the base of the Holocene  
842 using the Greenland NGRIP ice core, and selected auxiliary records. **J. Quaternary Sci.** 24(1): 3-17.  
843 <https://doi.org/10.1002/jqs.1227>
- 844 Weiss CL, Schuenemann VJ, Devos J, Shirsekar G, Reiter E, Gould BA, Stinchcombe JR, Krause J & Burbano HA  
845 (2016). Temporal patterns of damage and decay kinetics of DNA retrieved from plant herbarium specimens. **R.**  
846 **Soc. Open Sci.** 3(6): 160239. <https://doi.org/10.1098/rsos.160239>
- 847 Wu GA, Terol J, Ibanez V, López-García A, Pérez-Román E, Borredá C, Domingo C, Tadeo FR, Carbonell-  
848 Caballero J, Alonso R, Curk F, Du D, Ollitrault P, Roose ML, Dopazo J, Gmitter FG, Rokhsar DS & Talon M (2018).  
849 Genomics of the origin and evolution of Citrus. **Nature** 554(7692): 311-316.  
850 <https://doi.org/10.1038/nature25447>
- 851 Yoshida K, Burbano HA, Krause J, Thines M, Weigel D & Kamoun S (2014). Mining herbaria for plant pathogen  
852 genomes: back to the future. **PLoS Pathog.** 10(4): e1004028. <https://doi.org/10.1371/journal.ppat.1004028>
- 853 Yoshida K, Sasaki E & Kamoun S (2015). Computational analyses of ancient pathogen DNA from herbarium  
854 samples: challenges and prospects. **Front. Plant Sci.** 6: 771. <https://doi.org/10.3389/fpls.2015.00771>
- 855 Yoshida K, Schuenemann VJ, Cano LM, Pais M, Mishra B, Sharma R, Lanz C, Martin FN, Kamoun S, Krause J,  
856 Thines M, Weigel D & Burbano HA (2013). The rise and fall of the *Phytophthora infestans* lineage that triggered  
857 the Irish potato famine. **eLife** 2: e00731. <https://doi.org/10.7554/eLife.00731>
- 858 Yu GC, Smith DK, Zhu HC, Guan Y & Lam TTY (2017). GGTREE: an R package for visualization and annotation of  
859 phylogenetic trees with their covariates and other associated data. **Methods Ecol. Evol.** 8(1): 28-36.  
860 <https://doi.org/10.1111/2041-210x.12628>
- 861 Zech-Matterne V & Fiorentino G (2017). "Agrumed: archaeology and history of citrus fruit in the  
862 mediterranean". Napoli, Italy, Publications du Centre Jean Bérard. <https://doi.org/10.4000/books.pcbj.2107>
- 863 Zhang Y, Jalan N, Zhou X, Goss E, Jones JB, Setubal JC, Deng X & Wang N (2015). Positive selection is the main  
864 driving force for evolution of citrus canker-causing *Xanthomonas*. **ISME J.** 9(10): 2128-2138.  
865 <https://doi.org/10.1038/ismej.2015.15>
- 866
